1 **Ribosome stalling caused by the Argonaute-miRNA-SGS3 complex**  
2 **regulates production of secondary siRNA biogenesis in plants**

3

4 Hiro-oki Iwakawa<sup>1,2,\*</sup>, Andy Y.W. Lam<sup>1,3</sup>, Akira Mine<sup>2,4,5</sup>, Tomoya Fujita<sup>6,7</sup>, Kaori  
5 Kiyokawa<sup>1</sup>, Manabu Yoshikawa<sup>8</sup>, Atsushi Takeda<sup>4,5</sup>, Shintaro Iwasaki<sup>3,6</sup>, Yukihide  
6 Tomari<sup>1,3</sup>.

7

8 <sup>1</sup> Laboratory of RNA Function, Institute for Quantitative Biosciences, The University of  
9 Tokyo, Bunkyo-ku, Tokyo 113-0032, Japan.

10 <sup>2</sup>JST, PRESTO, Saitama 332-0012, Japan.

11 <sup>3</sup>Department of Computational Biology and Medical Sciences, Graduate School of  
12 Frontier Sciences, The University of Tokyo, Bunkyo-ku, Tokyo 113-0032, Japan.

13 <sup>4</sup>Ritsumeikan Global Innovation Research Organization, Ritsumeikan University,  
14 Kusatsu, Shiga 525-8577, Japan.

15 <sup>5</sup>Department of Biotechnology, Graduate School of Life Sciences, Ritsumeikan  
16 University, Shiga 525-8577, Japan.

17 <sup>6</sup>RNA Systems Biochemistry Laboratory, RIKEN Cluster for Pioneering Research, Wako,  
18 Saitama, 351-0198 Japan.

19 <sup>7</sup>School of Life Science and Technology, Tokyo Institute of Technology, Yokohama,  
20 Kanagawa, 226-8503 Japan.

21 <sup>8</sup>Division of Plant and Microbial Sciences, Institute of Agrobiological Sciences, National  
22 Agriculture and Food Research Organization, 2-1-2 Kannondai Tsukuba, Ibaraki 305-

23 8602, Japan.

24 \*Correspondence: [iwakawa@iqb.u-tokyo.ac.jp](mailto:iwakawa@iqb.u-tokyo.ac.jp) (H.-o.I)

25 \_\_\_\_\_

26 **Abstract**

27 The path of ribosomes on mRNAs can be impeded by various obstacles. One such  
28 example is halting of ribosome movement by microRNAs, though the exact mechanism  
29 and physiological role remain unclear. Here, we find that ribosome stalling caused by the  
30 Argonaute-miRNA-SGS3 complex regulates production of secondary siRNA biogenesis  
31 in plants. We show that the double-stranded RNA-binding protein, SGS3, directly  
32 interacts with the 3' end of the microRNA-Argonaute complex, resulting in ribosome  
33 stalling. Strikingly, microRNA-mediated ribosome stalling enhances production of  
34 secondary small interfering RNAs (siRNAs) from target mRNAs. Our results uncover a  
35 previously uncharacterized role for paused ribosomes in regulation of small RNA  
36 function that may have broad biological implications across the plant kingdom.

37 \_\_\_\_\_

38 **Main**

39 Ribosome movement can be interrupted by various factors including rare codons, special  
40 RNA structures and specific amino acid sequences called ribosome arrest peptides<sup>1,2</sup>.  
41 Although the physiological roles of such impediments are unclear, growing evidence  
42 indicates that ribosome stalling has diverse functions, including ER stress response,  
43 monitoring protein secretion, feedback regulation of methionine biosynthesis, quality  
44 control of mRNAs, and folding of nascent peptide chains<sup>2-4</sup>.

45         Recent findings suggested that microRNAs (miRNAs) can cause ribosome  
46 stalling as well as target RNA degradation or cleavage<sup>5-10</sup>. To pause ribosomes, miRNAs  
47 need to form RNA-induced silencing complexes (RISCs) with Argonaute (AGO) protein,  
48 and extensively base-pair within the coding sequence (CDS) of the target mRNA<sup>5,6,9</sup>.  
49 However, these requirements are not sufficient for ribosome stalling in plants; although  
50 many plant miRNAs have their cleavable targets with perfect or near perfect  
51 complementary binding sites in CDS, only a few miRNA binding sites can induce  
52 ribosome stalling *in vivo*<sup>9</sup>. Thus, unknown elements other than RISC binding should be  
53 required for miRNA-mediated ribosome pausing.

54         The biological function of the miRNA-mediated ribosome stalling also remains  
55 unclear. One plausible role of the miRNA-mediated ribosome stalling is inhibition of  
56 functional protein synthesis<sup>5-7</sup>. However, given that the target cleavage activity of plant  
57 RISC is functionally sufficient to silence target gene expression, ribosome stalling may  
58 have a role other than translation repression.

59            Here, we show that a dsRNA binding protein, SGS3, is a key determinant of  
60 miRNA-mediated ribosome stalling. SGS3 forms a complex on dsRNA protruding from  
61 the miR390-AGO7-target complex. These mechanisms also operate in the context of a  
62 distinct 22-nucleotide miRNA-AGO1-RISC complex. Importantly, we find that SGS3  
63 and miRNA-mediated ribosome stalling enhances amplification of RNA silencing,  
64 revealing a new role of ribosome pausing beyond inhibition of protein synthesis.

65

## 66 **Results**

### 67 **The dsRNA-binding protein SGS3 is a specific enhancer for microRNA-mediated** 68 **ribosome stalling**

69 We sought to find the miRNA-mediated ribosome stalling positions in a genome-wide  
70 scale. To do this, we first performed ribosome profiling, an approach that is based on  
71 sequencing of ribosome-protected footprints after RNase treatment<sup>11</sup>, in *Arabidopsis*  
72 seedlings. Our data represented a 3-nucleotide periodicity along the ORF, a hallmark of  
73 translation elongation (Extended Data Fig. 1a). We combined this high-resolution  
74 ribosome profiling and the miRNA target prediction<sup>12</sup> to identify the ribosome-stalling  
75 position upstream of the predicted miRNA binding sites (Supplementary Table 1). Along  
76 with earlier studies<sup>8-10</sup>, our ribosome profiling has shown that specific miRNAs, including  
77 miR390 and miR173, can induce ribosome stalling 12–13 nucleotide upstream of their  
78 binding sites in *Arabidopsis thaliana* (Fig. 1a, b, c, Extended Data Fig. 1b, c and d). These  
79 particular miRNAs are known to trigger the production of phased secondary small  
80 interfering RNAs (siRNAs), called trans-acting siRNAs (tasiRNAs), from precursors

81 called TAS RNAs<sup>13</sup>. tasiRNA production requires various factors including AGO7 and  
82 AGO1, which form specific RISCs with miR390 and miR173, respectively<sup>13-15</sup>. One  
83 important factor for tasiRNA biogenesis is SUPPRESSOR OF GENE SILENCING 3  
84 (SGS3)<sup>16-20</sup>. Given that SGS3 forms cytoplasmic foci named “siRNA bodies” with AGO7  
85 (ref. 20) and interacts with miR173-AGO1 RISC (ref. 21), we reasoned that SGS3  
86 influences miRNA-mediated ribosome stalling. To test this idea, we examined the impact  
87 of an SGS3 mutation on miRNA-mediated ribosome stalling by comparing ribosome  
88 profiling in wild-type and *sgs3-11 Arabidopsis* seedlings<sup>19</sup>. We observed dramatic  
89 decreases in ribosome stalling in *sgs3-11* mutants (Fig. 1b and c and Extended Data Fig.  
90 1b, c, d and 2). This reduction cannot be explained by a change in mRNA or miRNA  
91 abundance in the mutant (Fig. 1b and c and Extended Data Fig. 1, 2 and 3). Thus, we  
92 concluded that SGS3 is required for ribosome stalling by miR390 and miR173. Given  
93 that *sgs3-11* mutation did not cause an overall decrease in ribosome occupancy (Extended  
94 Data Fig. 2), SGS3 is not a general ribosome stalling factor, but rather a specific stalling  
95 enhancer for miRNA-mediated ribosome stalling.

96

### 97 **SGS3 and RISC cooperatively stall ribosomes *in vitro***

98 Although our ribosome profiling data demonstrate the involvement of SGS3 and miRNAs  
99 in ribosome stalling, how these factors coordinately pause ribosomes was unclear. To  
100 reveal the mechanisms of miRNA- and SGS3-dependent ribosome stalling, we adopted a  
101 tobacco BY-2 cell-free system, which can recapitulate miRNA-mediated RNA silencing  
102 *in vitro* (Fig. 2a)<sup>6,22</sup>. We used TAS3a as a representative target RNA. TAS3a contains a

103 short (51 codon) ORF and two miR390-binding sites: one is adjacent to the stop codon  
104 and immediately downstream of the ribosome stalling site, and the other is located well  
105 downstream of those elements (Fig. 2b)<sup>23</sup>. Ribosome stalling within the short ORF was  
106 monitored by detecting peptidyl-tRNAs, a hallmark of ribosome stalling, by western  
107 blotting to a FLAG-tag inserted in the F-TAS3 ORF (Fig. 2a and c). Western blotting  
108 followed a neutral pH gel electrophoresis that prevents hydrolysis of the ester linkage  
109 between the tRNA and amino acid<sup>24</sup>, thus enabling us to detect peptidyl-tRNAs within  
110 stalled ribosomes through an ~18 kDa upshift —the size of the tRNA moiety (Fig. 2c).  
111 Translation of the reporter (F-TAS3) in the presence of AGO7-RISC led to a clear band-  
112 shift (Fig. 2d and e). Disappearance of this signal after RNase treatment confirmed that  
113 the upshifted band corresponds to peptidyl-tRNA (Fig. 2d).

114           The two miR390-binding sites in TAS3a are functionally distinct; the 5'  
115 possesses central mismatches that preclude RISC-mediated target cleavage but allow  
116 stable binding, whereas the 3' miR390 binding site is centrally matched with the miR390  
117 and thus cleaves the TAS3a RNA (Fig. 2b)<sup>23</sup>. The adjacent 5' binding site is essential for  
118 ribosome stalling. Mutations in the “seed region”, which is critical for miRNA  
119 recognition, of the 3' miR390 binding site (Fig. 2b, F-TAS3\_3M) did not impair ribosome  
120 stalling, whereas also mutating the 5' binding site (Fig. 2b, F-TAS3\_5M\_3M) reduced  
121 stalling (Fig. 2d and e). Thus, ribosome stalling requires base-pairing between miR390 in  
122 AGO7-RISC and the 5' miR390-binding site in TAS3a. As the 3' site mutation increased  
123 peptidyl-tRNA accumulation, presumably by stabilizing the mRNA since it is no longer  
124 cleaved (Fig. 2d), we decided to use F-TAS3\_3M for further experiments.

125           We next sought to investigate the impact of SGS3 on ribosome stalling.  
126   Because endogenous SGS3 (NtSGS3) is abundant in BY-2 cells<sup>21</sup>, we immuno-depleted  
127   NtSGS3 from the lysate (Fig. 2f) and found decreased ribosome stalling (Fig. 2g and h).  
128   Supplementing with recombinant AtSGS3 markedly rescued ribosome stalling efficiency  
129   (Fig. 2f, g and h), indicating that SGS3 is a critical and limiting factor for miRNA-  
130   mediated ribosome stalling. Taken altogether, our *in vitro* system faithfully recapitulated  
131   ribosome stalling triggered by AGO7-RISC and SGS3.

132

### 133   **SGS3 binding to the 3' end of initiator microRNAs is required for ribosome pausing**

134   The functional roles of AGO7-RISC and SGS3 prompted us to hypothesize that these two  
135   factors form a complex that promotes ribosome stalling. SGS3 is an RNA-binding protein  
136   that preferentially binds RNA duplexes with a 5' overhang<sup>25</sup>. In theory, such a substrate  
137   is formed between the 3' end of miR390 within AGO7 and the 5' end of the miR390-  
138   binding site. We therefore hypothesized that SGS3 directly interacts with the end of the  
139   dsRNA protruding from AGO7. To test this scenario, we first examined the interaction  
140   between SGS3 and AGO7-RISC. The FLAG-tagged AGO7 mRNA was translated in the  
141   BY-2 cell lysate, then the miR390 duplex was added to program RISC. After further  
142   incubation with TAS3 mRNAs, the reaction mixture was used for co-  
143   immunoprecipitation with anti-FLAG antibody (Fig. 3a). This assay revealed that  
144   endogenous NtSGS3 binds AGO7-RISC only in the presence of both miR390 and TAS3  
145   variants with a wild-type 5' site (Extended Data Fig. 4a). Remarkably, introducing  
146   mismatches at the 5' end of the miR390-binding site (Fig. 3b, TAS3\_5endM\_3M) or using



147 a miR390 variant that is one-nucleotide shorter (20 nt) (Fig. 3b), which is not predicted  
148 to protrude from AGO7, disrupted the interaction between NtSGS3 and AGO7-RISC (Fig.  
149 3b, c, d, Extended Data Fig. 4b). These results strongly support a model where SGS3  
150 forms a complex with AGO7-RISC via dsRNA with a 5' overhang formed at the 3' end  
151 of miR390.

152 To test whether SGS3 directly interacts with the 3' end of miR390 on the *TAS3*  
153 RNA, we performed a site-specific UV crosslinking assay, in which molecules  
154 neighboring the 3' end of miR390 can be captured. We first substituted the 3' end cytidine  
155 of miR390 with a photo-reactive 4-thiouridine (Extended Data Fig. 4c, miR390\_4SU),  
156 and restored base-pairing using a TAS3a variant with a G-to-A substitution at the 5'  
157 miR390 binding site (Extended Data Fig. 4c, TAS3\_G21A\_3M). This variant  
158 successfully rescued the interaction between miR390\_21\_4SU-loaded AGO7 and  
159 NtSGS3 (Extended Data Fig. 4c and d). In this context of the reporter, proteins  
160 crosslinked to 5' radiolabeled miR390\_21\_4SU were separated on an SDS-PAGE gel (Fig.  
161 3e). In the absence of the target RNA, a specific band appeared at around 120 kDa (Fig.  
162 3f, red arrowhead). Immunoprecipitation using the anti-FLAG antibody revealed that the  
163 band corresponds to F-AGO7 (Fig. 3g, red arrowheads). Strikingly, addition of the target  
164 RNA changed the crosslinked protein from AGO7 to a ~90 kDa protein, which, verified  
165 as NtSGS3 using immunoprecipitation (Fig. 3f and h). These results indicate that target  
166 binding alters protein interactions at the 3' end of miR390, switching them from AGO7  
167 to SGS3, likely via conformational changes in AGO7-RISC.

168           To test if the physical interaction between SGS3 and AGO7-RISC is critical for  
169 ribosome pausing, we performed *in vitro* ribosome stalling experiments under conditions  
170 where SGS3 fails to bind AGO7-RISC using reporter variant F-TAS3\_5endM\_3M or the  
171 short 20-nt version of miR390. In both cases, stalling efficiencies were significantly  
172 decreased (Fig. 3i, j, k and l). Taken together, we find a direct interaction between SGS3  
173 and the 3' end of 21-nt miR390 bound to AGO7-RISC is necessary for ribosome stalling  
174 on TAS3 mRNA.

175           It is worth noting that the required length of miRNA for SGS3 binding and  
176 ribosome pausing may differ between partner AGO proteins. In contrast to AGO7,  
177 AGO1—bound by most miRNAs—requires a 22-nt long miR173 for both SGS3  
178 interaction and ribosome stalling (Fig. 4a, b, c and d)<sup>21</sup>. As miRNAs are typically 21-nt  
179 long, plants may have evolved a AGO1 structure that fully encapsulates the 21-nt  
180 miRNAs, thus limiting promiscuous SGS3 binding and ribosome stalling. Importantly,  
181 we find that ribosome pausing occurs even if TAS1 is cleaved by AGO1-RISC loaded  
182 with 22-nt miR173 (Fig. 4d and e). This is not limited to the TAS1 and miR173-AGO1  
183 pair. AGO7-miR390-SGS3 complex also stalls ribosomes on the cleavable binding site  
184 which has perfect complementarity to miR390 (Extended Data Fig. 5a, b and c). Because  
185 AGO-miRNA-SGS3 complex holds and stabilizes both 5' and 3' RNA fragments after  
186 target cleavage (Fig. 4e)<sup>21</sup>, we reasoned that SGS3 and RISC can stay on the cleaved  
187 targets long enough to stall ribosomes.

188

189   **Ribosome stalling enhances the production of secondary siRNAs**

190 The striking requirement of a TAS precursor structure for ribosome stalling (Fig. 1a, b  
191 and c, Extended Data Fig. 1b, c, d) led us to hypothesize that ribosome pausing by the  
192 SGS3-miRNA complex promotes tasiRNA production. So far, several studies have  
193 focused on the relationship between translation and tasiRNA biogenesis<sup>8-10,26,27</sup>. However,  
194 it is still controversial if positioning of the miRNA-binding site in the CDS or near the  
195 stop codon is important for tasiRNA production<sup>8,26,27</sup>. For example, previous quantitative  
196 RT-PCR (qRT-PCR) experiments showed no significant changes in tasiRNA production  
197 between the wild-type TAS3 and a mutant TAS3 that possesses an early stop codon  
198 located far upstream of the 5' miR390 binding site<sup>8</sup>, suggesting that ribosome stalling has  
199 no impact on the tasiRNA biogenesis. To carefully assess the impact of ribosome stalling  
200 on tasiRNA biogenesis, we first attempted to construct TAS3 variants with no ribosome  
201 stalling that retain binding to AGO7 and SGS3. Such variants were obtained by inserting  
202 4 or more nucleotides between the stop codon and 5' miR390 binding site in TAS3 (Fig.  
203 5a, b and Extended Data Fig. 6). As ribosomes stall one-codon upstream of the stop codon  
204 in TAS3, we reasoned that these insertions promote normal translation termination  
205 without interfering in the binding between AGO7-RISC and SGS3.

206 To test the hypothesis that ribosome pausing promotes the production of  
207 tasiRNAs, we compared tasiRNA accumulation in different TAS3 variants in *Nicotiana*  
208 *benthamiana* leaves. We opted to use Northern blotting for accurate detection of the  
209 secondary siRNAs, because this method can distinguish the canonical secondary siRNAs  
210 from the non-specific RNA fragments derived from the TAS3 reporters by size. Co-  
211 expression of miR390 and AGO7 efficiently produced 21-nt tasiRNAs, compared with

212 the 5' miR390 binding site mutant (TAS3\_5M) (Fig. 5c, d and e). Thus, our transient  
213 assay successfully recapitulated canonical TAS3 tasiRNA biogenesis. Importantly,  
214 placing the 5' miR390 binding site 6-nucleotide away (Fig. 5c, TAS3+6) significantly  
215 reduced tasiRNA production to ~60% (Fig. 5d and e), suggesting that clearance of stalled  
216 ribosomes impairs efficient tasiRNA production. In contrast, tasiRNA production from a  
217 TAS3 variant with a 3-nucleotide insertion (Fig. 5c, TAS+3), which still stalls ribosomes,  
218 was comparable to that from wild-type TAS3 (Fig. 5d and e). To confirm if ribosome  
219 stalling enhances the tasiRNA biogenesis, we introduced artificial tandem stop codons at  
220 the ~120 nt upstream of the miR390 target site (early\_stop), which forces ribosomes to  
221 terminate without stalling (Fig. 5c). In contrast to the previous report<sup>8</sup>, our quantitative  
222 Northern blotting revealed that the tandem early stop codons significantly reduced  
223 tasiRNA production to ~60%, similarly to TAS3+6 (Fig. 5d and e). These data were not  
224 explained by changes in precursor *TAS3* abundance (Fig. 5f and g). Altogether, we  
225 conclude that ribosome stalling regulates secondary siRNA production in a manner  
226 different from stabilization of mRNAs.

227

## 228 **Discussion**

229 Here, we find that the dsRNA-binding protein SGS3 forms ribosome stalling complexes  
230 on the protruding end of the dsRNA formed between the TAS RNAs and miR390-AGO7  
231 or 22-nt miR173-AGO1-RISC (Fig. 6). In general, the ribosome displaces RNA binding  
232 proteins bound to mRNAs during elongation<sup>28</sup>, suggesting that SGS3 imposes an extreme  
233 barrier for trailing ribosomes. A recent study suggested that unconventional base-pairing

234 between human miRNAs and target sites cause transient ribosome stalling<sup>5</sup>. Although the  
235 precise stalling mechanism remains unclear in animals, there may be an RNA-binding  
236 protein(s) that protects the 3' end of miRNA from the helicase activity of ribosomes.

237 Strikingly, we demonstrate that ribosome stalling is a regulator for tasiRNA  
238 biogenesis (Fig.5d, e and 6). This is supported from an evolutionary standpoint; most  
239 plant species have the 5' miR390 binding site just downstream the stop codon or in the  
240 CDS of TAS3 (Supplementary Table 2). The molecular details of how ribosome stalling  
241 enhances tasiRNA production warrant future studies. Given that arrest peptide-mediated  
242 ribosome-pausing induces changes in mRNA localization in animal cells<sup>29</sup>, we suggest  
243 that miRNA-mediated ribosome pausing may promote to deliver the tasiRNA precursors  
244 to a secondary siRNA “factory”, such as the siRNA body<sup>20</sup>.

245 We observed SGS3- and RISC-dependent ribosome stalling in five TAS loci in  
246 *Arabidopsis* (Fig. 1). However, they must be just a tip of the iceberg of miRNA-mediated  
247 ribosome pausing. There are many DNA regions named PHAS loci that produce phased  
248 secondary siRNAs (phasiRNAs) by the same mechanism as TAS loci<sup>13</sup>. Although our  
249 ribosome profiling failed to detect obvious ribosome stalling 11–14 nt upstream of  
250 miRNA binding sites in known PHAS loci (Fig. 1 and Supplementary Table 1), more  
251 sensitive methods like single-molecule imaging<sup>30</sup> may reveal ribosome stalling on the  
252 miRNA-bound targets. In addition to miRNAs, siRNAs may also induce ribosome  
253 stalling. A recent study demonstrates that 22-nt siRNAs, which have the potential to  
254 recruit SGS3, accumulate upon environmental stress, trigger the RNA silencing  
255 amplification, and mediate translational repression<sup>31</sup>. Such 22-nt siRNAs are also induced

256 by viral infection<sup>16,32–35</sup>. Therefore, SGS3- and miRNA/siRNA-mediated ribosome  
257 stalling is likely to have an impact on a wider range of cellular processes such as stress  
258 adaptation and antiviral immunity in plants.

259

260

---

261 **Main references**

262

- 263 1. Schuller, A. P. & Green, R. Roadblocks and resolutions in eukaryotic translation.  
264 *Nat Rev Mol Cell Biol* **19**, 526-541 (2018).
- 265 2. Ito, K. & Chiba, S. Arrest peptides: cis-acting modulators of translation. *Annu Rev*  
266 *Biochem* **82**, 171-202 (2013).
- 267 3. Stein, K. C., Kriel, A. & Frydman, J. Nascent Polypeptide Domain Topology and  
268 Elongation Rate Direct the Cotranslational Hierarchy of Hsp70 and TRiC/CCT.  
269 *Mol Cell* **75**, 1117-1130.e5 (2019).
- 270 4. Inada, T. The Ribosome as a Platform for mRNA and Nascent Polypeptide  
271 Quality Control. *Trends Biochem Sci* **42**, 5-15 (2017).
- 272 5. Zhang, K. et al. A novel class of microRNA-recognition elements that function  
273 only within open reading frames. *Nat Struct Mol Biol* (2018).
- 274 6. Iwakawa, H. O. & Tomari, Y. Molecular Insights into microRNA-Mediated  
275 Translational Repression in Plants. *Mol Cell* **52**, 591-601 (2013).
- 276 7. Iwakawa, H. O. & Tomari, Y. The Functions of MicroRNAs: mRNA Decay and  
277 Translational Repression. *Trends Cell Biol* **25**, 651-665 (2015).
- 278 8. Bazin, J. et al. Global analysis of ribosome-associated noncoding RNAs unveils  
279 new modes of translational regulation. *Proc Natl Acad Sci U S A* **114**, E10018-  
280 E10027 (2017).
- 281 9. Hou, C. Y. et al. Global Analysis of Truncated RNA Ends Reveals New Insights  
282 into Ribosome Stalling in Plants. *Plant Cell* **28**, 2398-2416 (2016).
- 283 10. Li, S. et al. Biogenesis of phased siRNAs on membrane-bound polysomes in  
284 Arabidopsis. *Elife* **5**, e22750 (2016).
- 285 11. Ingolia, N. T., Ghaemmaghami, S., Newman, J. R. & Weissman, J. S. Genome-  
286 wide analysis in vivo of translation with nucleotide resolution using ribosome  
287 profiling. *Science* **324**, 218-223 (2009).
- 288 12. Dai, X., Zhuang, Z. & Zhao, P. X. psRNATarget: a plant small RNA target  
289 analysis server (2017 release). *Nucleic Acids Res* **46**, W49-W54 (2018).
- 290 13. Fei, Q., Xia, R. & Meyers, B. C. Phased, secondary, small interfering RNAs in  
291 posttranscriptional regulatory networks. *Plant Cell* **25**, 2400-2415 (2013).
- 292 14. Montgomery, T. A. et al. Specificity of ARGONAUTE7-miR390 interaction and

- 293 dual functionality in TAS3 trans-acting siRNA formation. *Cell* **133**, 128-141  
294 (2008).
- 295 15. Endo, Y., Iwakawa, H. O. & Tomari, Y. Arabidopsis ARGONAUTE7 selects  
296 miR390 through multiple checkpoints during RISC assembly. *EMBO Rep* **14**,  
297 652-658 (2013).
- 298 16. Mourrain, P. et al. Arabidopsis SGS2 and SGS3 genes are required for  
299 posttranscriptional gene silencing and natural virus resistance. *Cell* **101**, 533-542  
300 (2000).
- 301 17. Allen, E., Xie, Z., Gustafson, A. M. & Carrington, J. C. microRNA-directed  
302 phasing during trans-acting siRNA biogenesis in plants. *Cell* **121**, 207-221 (2005).
- 303 18. Vazquez, F. et al. Endogenous trans-acting siRNAs regulate the accumulation of  
304 Arabidopsis mRNAs. *Mol Cell* **16**, 69-79 (2004).
- 305 19. Peragine, A., Yoshikawa, M., Wu, G., Albrecht, H. L. & Poethig, R. S. SGS3 and  
306 SGS2/SDE1/RDR6 are required for juvenile development and the production of  
307 trans-acting siRNAs in Arabidopsis. *Genes Dev* **18**, 2368-2379 (2004).
- 308 20. Jouannet, V. et al. Cytoplasmic Arabidopsis AGO7 accumulates in membrane-  
309 associated siRNA bodies and is required for ta-siRNA biogenesis. *EMBO J* **31**,  
310 1704-1713 (2012).
- 311 21. Yoshikawa, M. et al. 3' fragment of miR173-programmed RISC-cleaved RNA is  
312 protected from degradation in a complex with RISC and SGS3. *Proc Natl Acad*  
313 *Sci U S A* **110**, 4117-4122 (2013).
- 314 22. Iki, T. et al. In vitro assembly of plant RNA-induced silencing complexes  
315 facilitated by molecular chaperone HSP90. *Mol Cell* **39**, 282-291 (2010).
- 316 23. Axtell, M. J., Jan, C., Rajagopalan, R. & Bartel, D. P. A two-hit trigger for siRNA  
317 biogenesis in plants. *Cell* **127**, 565-577 (2006).
- 318 24. Nakatogawa, H. & Ito, K. Secretion monitor, SecM, undergoes self-translation  
319 arrest in the cytosol. *Mol Cell* **7**, 185-192 (2001).
- 320 25. Fukunaga, R. & Doudna, J. A. dsRNA with 5' overhangs contributes to  
321 endogenous and antiviral RNA silencing pathways in plants. *EMBO J* **28**, 545-555  
322 (2009).
- 323 26. Zhang, C., Ng, D. W., Lu, J. & Chen, Z. J. Roles of target site location and  
324 sequence complementarity in trans-acting siRNA formation in Arabidopsis. *Plant*  
325 *J* **69**, 217-226 (2012).



- 326 27. Yoshikawa, M. et al. A Short Open Reading Frame Encompassing the  
327 MicroRNA173 Target Site Plays a Role in trans-Acting Small Interfering RNA  
328 Biogenesis. *Plant Physiol* **171**, 359-368 (2016).
- 329 28. Halstead, J. M. et al. TRICK: A Single-Molecule Method for Imaging the First  
330 Round of Translation in Living Cells and Animals. *Methods Enzymol* **572**, 123-  
331 157 (2016).
- 332 29. Yanagitani, K., Kimata, Y., Kadokura, H. & Kohno, K. Translational pausing  
333 ensures membrane targeting and cytoplasmic splicing of XBP1u mRNA. *Science*  
334 **331**, 586-589 (2011).
- 335 30. Ruijtenberg, S. et al. mRNA structural dynamics shape Argonaute-target  
336 interactions. *Nat Struct Mol Biol* (2020).
- 337 31. Wu, H. et al. Plant 22-nt siRNAs mediate translational repression and stress  
338 adaptation. *Nature* **581**, 89-93 (2020).
- 339 32. Akbergenov, R. et al. Molecular characterization of geminivirus-derived small  
340 RNAs in different plant species. *Nucleic Acids Res* **34**, 462-471 (2006).
- 341 33. Deleris, A. et al. Hierarchical action and inhibition of plant Dicer-like proteins in  
342 antiviral defense. *Science* **313**, 68-71 (2006).
- 343 34. Garcia-Ruiz, H. et al. Arabidopsis RNA-dependent RNA polymerases and dicer-  
344 like proteins in antiviral defense and small interfering RNA biogenesis during  
345 Turnip Mosaic Virus infection. *Plant Cell* **22**, 481-496 (2010).
- 346 35. Diaz-Pendon, J. A., Li, F., Li, W. X. & Ding, S. W. Suppression of antiviral  
347 silencing by cucumber mosaic virus 2b protein in Arabidopsis is associated with  
348 drastically reduced accumulation of three classes of viral small interfering RNAs.  
349 *Plant Cell* **19**, 2053-2063 (2007).

350

351

352 **Methods**

353

354 **General methods.**

355 Preparation of tobacco BY-2 lysate, substrate mixture (containing ATP, ATP-regeneration  
356 system, and amino acid mixture), 1×lysis buffer [30 mM HEPES-KOH (pH 7.4), 100 mM  
357 potassium acetate, 2 mM magnesium acetate], and microRNA duplexes (Supplementary  
358 Table 3) have been previously described in detail<sup>1</sup>. mRNAs were transcribed *in vitro* from  
359 NotI- (for plasmids with the prefix “pBYL-”) or XhoI- (for plasmids with the prefix  
360 “pUC57-”) digested plasmids or PCR products using the AmpliScribe T7 High Yield  
361 Transcription Kit (Lucigen), followed by capping with ScriptCap m<sup>7</sup>G Capping System  
362 (Cell Script). Poly(A)-tails were added to transcripts from pUC57-plasmids or PCR  
363 products using the T7 promoter by A-Plus Poly(A) Polymerase Tailing Kit (Cell Script).  
364 Anti-AtSGS3 (diluted at 1:3000) and anti-AtAGO7 antibodies (diluted at 1:3000) were  
365 raised in rabbits using synthetic peptides (NH<sub>2</sub>-MSSRAGPMSKEKNVQGGC-COOH)  
366 and (NH<sub>2</sub>-IPSSKSRTPLLHKPYHHC-COOH) as antigens respectively, and affinity-  
367 purified (Medical & Biological Laboratories).

368

369 **Plants and growth conditions.**

370 *Arabidopsis thaliana* wild-type (Col-0) and the *sgs3-11* mutant<sup>2</sup> were used in this study.  
371 Seeds were incubated in 70% EtOH at room temperature for 2 min, sterilized with liquid  
372 sodium hypochlorite, washed 5 times in sterile water, sown on filter paper (Whatman  
373 No.2), laid on Murashige and Skoog (MS)-agar plates (1×MS salt, 1% sucrose, 1% agar,

374 pH 5.7) and incubated at 4°C for 3 days. After vernalization, the plates were incubated at  
375 22°C for 3 days under continuous LED light (LC-LED450W, TAITEC).

376

### 377 **Ribosome profiling.**

378 Briefly, 0.2 g of frozen seedlings and 400 µl of *Arabidopsis* lysis buffer (100 mM Tris-  
379 HCl pH 7.5, 40 mM KCl, 20 mM MgCl<sub>2</sub>, 1 mM DTT, 100 µg/ml cycloheximide and 1%  
380 Triton X-100) were crushed into a powder using the Multi-beads shocker (Yasui Kikai).  
381 The 3000 × g supernatant of the lysate was mixed with 25 µl of Turbo DNase (Thermo  
382 Fisher Scientific) and incubated on ice for 10 min. RNA concentration was measured with  
383 a Qubit RNA BR Assay Kit (Thermo Fisher Scientific). Ribosome footprints ranging  
384 between 17 and 34 nt were gel-purified and subsequent library preparation were executed  
385 as previously described<sup>3,4</sup>. Two libraries from two biological replicates (WT\_rep1,  
386 WT\_rep2, sgs3\_rep1 and sgs3\_rep2) were sequenced on a HiSeq4000 (Illumina). 24 to  
387 29 nt footprints were mapped onto the TAIR10 *Arabidopsis thaliana* genome sequence,  
388 excluding rRNA/tRNAs. Empirically, A-site position was estimated as 11 for 24 nt, 12  
389 for 25 nt, 13 for 26 nt, 14 for 27 nt, 15 for 28 nt, 16 for 29 nt, based on the homogeneous  
390 5' end of the reads. The relative ribosome occupancy  $r$  at position  $j$  in an ORF of gene  $g$   
391 of length  $l$  is defined as follows:

392

393

$$r_{gj} = \frac{f_{gj}}{d_{gj}}$$

394 where

395 
$$d_{gj} = \frac{(\sum_{i=1}^l f_i) - f_j}{l - 1}$$

396  $f_{gj}$  is the footprint at position  $j$  in a ORF of gene  $g$ .  $r_{gj}$  is a ratio of  $f_{gj}$  to the average  
397 footprint across nucleotide positions on the ORF of the same gene,  $d_{gj}$ .

398

399 **microRNA target prediction.**

400 The targets of mature *Arabidopsis* microRNA sequences [miRbase (miRbase20)<sup>5,6</sup>] were  
401 predicted using the psRNATarget server<sup>7,8</sup> with the following settings: # of top targets =  
402 15, Expectation = 3, Seed region = 2-8 nt.

403

404 **RNA-seq.**

405 Total RNA was extracted from seedlings with Trizol (Thermo Fisher Scientific). Library  
406 construction and deep sequencing were performed by AnnoRoad in Beijing. Reads were  
407 mapped to the transcripts of *Arabidopsis thaliana* (derived from TAIR10, ver. 10 released  
408 on 2010 in psRNATarget server<sup>7,8</sup>) by Bowtie2<sup>9</sup>. Sam files were converted to bam files  
409 using SAMtools<sup>10</sup> and then to bed files with BEDTools<sup>11</sup>. BEDtools<sup>11</sup> was used to  
410 calculate the depth of coverage for every base across mRNAs shown in Fig 1b, c,  
411 Extended Data Fig. 1b, c and d.

412

413 **Plasmid construction.**

414 The following constructs used in this study have been previously described: pBYL2<sup>12</sup>,  
415 pBYL-AGO1<sup>13</sup>, pBYL-AGO7<sup>13</sup>, pBYL-3×FLAG-AGO7<sup>13</sup>, pBYL-3×FLAG-AGO1<sup>13</sup>,

416 pBYL-3×FLAG-SUMO-AtAGO1<sup>14</sup>, pAT006<sup>15</sup>, pMDC32<sup>16</sup>, pMDC-Tas3a<sup>17</sup>, pMDC-HA-  
417 AGO7<sup>17</sup>, pMDC-miR390<sup>17</sup>. The DNA fragments used for plasmid construction are listed  
418 in Supplementary Table 4.

419

420 *pBYL-3×HA*

421 A DNA fragment containing the T7 promoter, 5' UTR of *Arabidopsis thaliana* alcohol  
422 dehydrogenase 1 and 3×HA tag (T7\_ADH\_5UTR\_3×HA, Supplementary Table 4) was  
423 cloned into XbaI/AscI-digested pBYL2 vector using the HiFi DNA Assembly Cloning kit  
424 (New England Biolabs).

425

426 *pBYL-3×HA-AGO7*

427 A DNA fragment containing AGO7 ORF was amplified by PCR with pBYL-AGO7<sup>13</sup>  
428 using primers oligoE1 and oligoE2, digested by AscI, and cloned into AscI-digested  
429 pBYL-3×HA vector by ligation.

430

431 *pBYL-3×HA-AGO1*

432 A PCR fragment with AGO1 ORF following 3×HA tag was amplified by overlap  
433 extension PCR with pBYL-AGO1<sup>13</sup> as template using primers oligo1118 and oligo1094.  
434 The fragment was cloned into AscI-digested pBYL2 vector via HiFi DNA Assembly  
435 Cloning kit (New England Biolabs).

436

437 *pUC57-TAS3*

438 The TAS3a sequence (AT3G17185.1) following T7 promoter (T7\_TAS3a,  
439 Supplementary Table 4) was inserted into EcoRV-digested pUC57 vector via GenScript  
440 gene synthesis service.

441

442 *pUC57-F-TAS3*

443 Three DNA fragments were prepared by PCR: TAS3a\_5' UTR fragment amplified from  
444 pUC57-TAS3 using primers oligo1062 and oligo1063, 3×FLAG tag sequence amplified  
445 using two oligos, oligo1064 and oligo512 and the TAS3a ORF amplified from pUC57-  
446 TAS3 using primers, oligo1065 and oligo1066. The three DNA fragments were cloned  
447 into SacII/XhoI-digested pUC57-TAS3a via HiFi DNA Assembly Cloning kit (New  
448 England Biolabs).

449

450 *pUC57-F-TAS3\_3M*

451 Seven nucleotide mismatches were introduced into the seed sequence of the 3' miR390  
452 binding site (Fig. 2c) in pUC57-F-TAS3 by site directed mutagenesis using primers  
453 oligo1073 and oligo1074.

454

455 *pUC57-F-TAS3\_5M\_3M*

456 Seven nucleotide mismatches were introduced into the seed sequence of the 5' miR390  
457 binding site (Fig. 2c) in pUC57-F-TAS3\_3M by site directed mutagenesis using primers  
458 oligo 1099 and oligo1100.

459

460 *pUC57-F-TAS3\_3M(+1)*, *pUC57-F-TAS3\_3M(+2)*, *pUC57-F-TAS3\_3M(+3)*, *pUC57-F-*  
461 *TAS3\_3M(+4)*, *pUC57-F-TAS3\_3M(+5)*, *pUC57-F-TAS3\_3M(+6)* and *pUC57-F-*  
462 *TAS3\_3M(+7)*

463 One to six nucleotides, as shown in Fig. 5a, were inserted between the stop codon of the  
464 short ORF and 5' miR390 binding site in *pUC57-F-TAS3\_3M* by site directed PCR using  
465 primer pairs of oligo1180-oligo1181, oligo1182-oligo1183, oligo1161-oligo1162,  
466 oligo1163-oligo1164, oligo1165-oligo1166, oligo1167-oligo1168 and oligo1169-  
467 oligo1170, respectively.

468

469 *pEU-6×His-SBP-SUMO-AtSGS3*

470 Two DNA fragments were prepared by PCR: 6×His-SBP-SUMOstar-tag fragment  
471 amplified from *pASW-SUMO-AtRDR6 (Opt)*<sup>18</sup> using oligo1044 and oligo1039 and SGS  
472 ORF fragment amplified from cDNA of *Arabidopsis thaliana* using oligoK1 and oligoK2.  
473 The two DNA fragments were inserted into EcoRV/SmaI-digested *pEU-E01-MCS* vector  
474 via HiFi DNA Assembly Cloning kit (New England Biolabs).

475

476 *pBYL-3×FLAG-SUMOstar-tag-AGO7*

477 Two PCR products were prepared by PCR: 3×FLAG-SUMOstar-tag fragment amplified  
478 from *pBYL-3×FLAG-SUMO-AtAGO1*<sup>14</sup> using primers oligo955 and oligo1039 and  
479 AGO7 fragment amplified from *pBYL-AGO7*<sup>13</sup> using primers oligo1159 and oligo1160.  
480 The two fragments were cloned into AscI-digested *pBYL2* vector<sup>12</sup> via HiFi DNA  
481 Assembly Cloning kit (New England Biolabs).

482

483 *pUC57-F-TAS3\_5endM\_3M* and *pUC57-F-TAS3\_5P\_3M*

484 The 5' miR390-binding site in *pUC57-F-TAS3\_3M* was replaced by the sequences shown  
485 in Figure 3b and Extended Data Fig. 5 by site directed mutagenesis using primer pairs  
486 oligo1101-oligo1102 and oligo 1106-oligo1107, respectively.

487

488 *pUC57-TAS3\_3M*, *pUC57-TAS3\_5endM\_3M*, *pUC57-TAS3\_5P\_3M*, *pUC57-*  
489 *TAS3\_M(+1)*, *pUC57-TAS3\_M(+2)*, *pUC57-TAS3\_M(+3)*, *pUC57-TAS3\_M(+4)*,  
490 *pUC57-TAS3\_M(+5)*, *pUC57-TAS3\_M(+6)* and *pUC57-TAS3\_M(+7)*

491 The 3×FLAG tag sequences were removed from the corresponding *pUC57-F-TAS3*  
492 constructs shown above by site directed mutagenesis using primers oligo1197 and  
493 oligo1198.

494

495 *pUC57-TAS3\_G21A\_3M*

496 The 5' terminal G nucleotide of 5' miR390-binding site in *pUC57-TAS3\_3M* was  
497 substituted to A by site directed mutagenesis using primers oligo1220 and oligo1221.

498

499 *pCR-Blunt II-TOPO\_TAS1a*

500 TAS1a PCR product was amplified from cDNA corresponding to *Arabidopsis* seedling  
501 total RNA using oligoA1 and oligoA2 for the TAS1a sequence and cloned into pCR Blunt  
502 II-TOPO vector (Invitrogen, #45-0245).

503



504 *pCR-Blunt II-TOPO\_3×FLAG-TAS1a*

505 Three PCR fragments were prepared from pCR-Blunt II-TOPO\_TAS1a: TOPO-TAS1a 5'  
506 UTR fragment amplified with oligoA3 and oligoA4 and then digested with XhoI, FLAG-  
507 TAS1a fragment amplified with oligoA5 and oligoA6 and ORF-3' UTR-TOPO fragment  
508 amplified with oligoA7 and oligoA8 and then digested with SpeI. To insert the 3×FLAG  
509 sequence directly in front of ORF1, the above three PCR fragments were cloned into  
510 XhoI/SpeI-digested pCR Blunt II-TOPO vector (Invitrogen) using the HiFi DNA  
511 Assembly Cloning kit (New England Biolabs).

512

513 T7-TAS1a and T7-F-Tas1a

514 T7-TAS1a and T7-F-Tas1a DNA templates were amplified from pCR-Blunt II-  
515 TOPO\_TAS1a and pCR Blunt II-TOPO-3xFLAG-TAS1a, respectively, using a forward  
516 primer containing T7 polymerase binding site (oligoA9) and a reverse primer with  
517 poly(A) tail (oligoA10).

518

519 *pAT006-TAS3a-PDS\_full-length*

520 A TAS3a fragments with a full-length 5' UTR, a natural intron and tandem synthetic-  
521 tasiRNAs in the 5' D7[+] and 5' D8[+] positions (TAS3aPDS2) was synthesized via  
522 GeneArt Strings DNA Fragments service (invitrogen), gel-purified and cloned into  
523 Sall/SpeI-digested pAT006<sup>15</sup> vector via HiFi DNA Assembly Cloning kit (New England  
524 Biolabs).

525

526 *pMDC32\_TAS3*

527 Two PCR products were amplified: fragment A from pAT006-TAS3a-PDS\_full-length  
528 using primers oligo1201 and oligo1202 and fragment B from pMDC-Tas3a<sup>17</sup> using  
529 primers oligo1203 and oligo1204. The two fragments were cloned into KpnI/SpeI-  
530 digested pMDC32 vector via HiFi DNA Assembly Cloning kit (New England Biolabs).

531

532 *pMDC32\_TAS3\_5M*

533 Two PCR products were amplified: fragment A from pAT006-TAS3a-PDS\_full-length  
534 using primers oligo1201 and oligo1209 and fragment B from pMDC-Tas3a<sup>17</sup> using  
535 primers oligo1210 and oligo1204. The two fragments were cloned into KpnI/SpeI-  
536 digested pMDC32 vector via HiFi DNA Assembly Cloning kit (New England Biolabs).

537

538 *pMDC32\_early\_stop*

539 Two PCR products were amplified: fragment A from pAT006-TAS3a-PDS\_full-length  
540 using primers oligo1201 and oligo1211 and fragment B from pMDC-Tas3a<sup>17</sup> using  
541 primers oligo1212 and oligo1204. The two fragments were cloned into KpnI/SpeI-  
542 digested pMDC32 vector via HiFi DNA Assembly Cloning kit (New England Biolabs).

543

544 *pMDC32\_TAS3(+3)*

545 Two PCR products were amplified: fragment A from pAT006-TAS3a-PDS\_full-length  
546 using primers oligo1201 and oligo1207 and fragment B from pMDC-Tas3a<sup>17</sup> using  
547 primers oligo1208 and oligo1204. The two fragments were cloned into KpnI/SpeI-

548 digested pMDC32 vector via HiFi DNA Assembly Cloning kit (New England Biolabs).

549

550 *pMDC32\_TAS3(+6)*

551 Two PCR products were amplified: fragment A from pAT006-TAS3a-PDS\_full-length

552 using primers oligo1201 and oligo1205 and fragment B from pMDC-Tas3a<sup>17</sup> using

553 primers oligo1206 and oligo1204. The two fragments were cloned into KpnI/SpeI-

554 digested pMDC32 vector via HiFi DNA Assembly Cloning kit (New England Biolabs).

555

#### 556 **Production of recombinant AtSGS3 protein**

557 Recombinant AtSGS3 proteins were expressed using the Premium PLUS Expression kit

558 (Cell-Free Sciences) with pEU-6×His-SBP-SUMO-AtSGS3 according to manufacturer

559 instructions. The protein was affinity purified with streptavidin sepharose high

560 performance beads (GE Healthcare), washed three times with 1 × lysis buffer containing

561 200 mM NaCl and 0.1% TritonX-100, rinsed once with 1 × lysis buffer containing 20%

562 glycerol and 1mM DTT and eluted by 1 × lysis buffer containing 20% glycerol, 1 mM

563 DTT and 0.05 U/μl of SUMOstar protease. Protein concentration was determined using

564 SDS-PAGE with defined dilutions of BSA as concentration standards.

565

#### 566 ***In vitro* RNA silencing assay, NuPAGE and Western blotting**

567 Typically, 7.5 μl of BY-2 lysate, 3.75 μl of substrate mixture, and 0.75 μl of 300 nM AGO

568 mRNAs were mixed and incubated at 25°C for 30 min. To assemble RISC, 1.5 μl of 1.5

569 μM miR390 or miR173 duplex was added to the reaction mixture and incubated at 25°C

570 for 90 min. Then, 1.5  $\mu$ l of 100 nM TAS3a or TAS1a variant was added and further  
571 incubated at 25°C for 10–60 min. For RNase treatment, 5  $\mu$ l of the reaction was treated  
572 with 1  $\mu$ l of RNase mixture (10% RNase A, Sigma + 20% RNase One, Promega),  
573 incubated at 37°C for 10 min and then mixed with 6  $\mu$ l of 2  $\times$  SDS-PAGE buffer. For  
574 the control, 1  $\mu$ l sterile water was used instead of RNase mixture. The samples were run  
575 on NuPAGE Bis-Tris Precast Gel (Thermo Fisher Scientific) at 200 V for ~30 min in 1  $\times$   
576 NuPAGE MES SDS Buffer (Thermo Fisher Scientific) and transferred onto PVDF  
577 membrane. Western blotting was performed as previously described<sup>1</sup> with modifications.  
578 The membrane was blocked in TBST containing 1.0% nonfat dried milk (w/v) for 30 min.  
579 Anti-AtSGS3 (diluted at 1:3000), anti-AtAGO7 antibodies (diluted at 1:3000), anti-  
580 NtSGS3 antibody (diluted at 1:3000)<sup>19</sup>, anti-DDDDK-tag mAb (diluted at 1:5000)  
581 (Medical & Biological Laboratories) and anti-HA-tag mAb (diluted at 1:5000) (Medical  
582 & Biological Laboratories) were used as primary antibodies. Peroxidase AffiniPure Goat  
583 Anti-Rabbit IgG (H+L) (diluted at 1:20000) (Jackson ImmunoResearch), Anti-IgG (H+L)  
584 (Mouse) pAb-HRP (diluted at 1:5000) (Medical & Biological Laboratories) and Mouse  
585 TrueBlot ULTRA: Anti-Mouse Ig HRP (Rockland Immunochemicals, Inc.) (1:1000) were  
586 used as secondary antibodies.

587

### 588 **Northern blotting**

589 For *in vitro* assays, two microliter of reaction mixture was mixed with 8  $\mu$ l of low salt PK  
590 solution [0.125% SDS, 12.5 mM EDTA, 12.5 mM HEPES-KOH (pH7.4) and 12.5%  
591 Proteinase K (TaKaRa)], and incubated at 50°C for 10 min. Ten microliter of 2  $\times$

592 formamide dye [10 mM EDTA, pH 8.0, 98% (w/v) deionized formamide, 0.025% (w/v)  
593 xylene cyanol and 0.025% (w/v) bromophenol blue] was added into the mixture, and  
594 further incubated at 65°C for 10 minutes. For *in vivo* assays, total RNA was purified with  
595 Trizol reagent (Thermo Fisher Scientific), and 10 µl of 300–500 ng/ul total RNAs were  
596 mixed with equal volume 2 × formamide dye. Ten µl of samples were run on a denaturing  
597 1% agarose gel, transferred to the Hybond N+ membrane with capillary blotting and fixed  
598 with UV crosslinker. For small RNAs, 10 µl of samples were run on a denaturing 18%  
599 acrylamide gel. RNAs were transferred to Hybond N membrane with electro blotting and  
600 chemically crosslinked<sup>20</sup>. TAS3 variants were detected with Digoxigenin (DIG)-labeled  
601 long TAS3 probe (Fig. 2d) or 5' <sup>32</sup>P-radiolabeled oligo probe mixtures (oligo1230-1234)  
602 (Fig. 5f). F-TAS1a and its 5' cleaved fragment were detected with a 5' <sup>32</sup>P-radiolabeled  
603 oligo probe (oligoA4) (Fig. 4e). U6 RNA, miR173, miR390, and tasiRNAs from TAS3  
604 variants were detected with 5' <sup>32</sup>P-radiolabeled oligo1129, oligo1353, oligo1131, oligoD7,  
605 respectively.

606

#### 607 **Immunoprecipitation with anti-FLAG antibody**

608 F-AGO7-RISC or F-AGO1-RISC was assembled as shown above. Target RNAs were  
609 mixed with the RISCs at a final concentration of 50 nM, and incubated for 20 min. The  
610 reaction mixture was incubated with Dynabeads protein G (Invitrogen) coated with anti-  
611 FLAG antibody on a rotator at 4°C for 1 h. The beads were washed three times with 1 ×  
612 lysis buffer containing 200 mM NaCl and 1% Triton-X 100 or 1 × wash buffer (20 mM  
613 Hepes, pH 7.5, 120 mM KCl, 10 mM MgCl<sub>2</sub> and 0.2% Nonidet P-40). After removing

614 buffer completely, 1×SDS-PAGE sample buffer was added to the beads. The samples  
615 (input, supernatant, and beads) were heated for 5 min and used for SDS-PAGE. Western  
616 blotting was performed as described above.

617

### 618 **Immunodepletion of endogenous SGS3 protein**

619 Fifty microliter of BY-2 lysate was mixed with 1.66 µg of anti-NtSGS3<sup>19</sup> or Normal  
620 Rabbit IgG (Medical & Biological Laboratories) at 4°C for 1h. To remove the antibodies  
621 and binding proteins thereof, the lysate was mixed with the pellet of 50 µl Dynabeads  
622 protein G, and incubated at 4°C for 1h. The supernatant was transferred into new tubes.  
623 After flash freezing by liquid nitrogen, the SGS3 or Mock-depleted lysate was stored at -  
624 80°C .

625

### 626 **Photoactivated UV crosslinking**

627 *In vitro* reaction mixtures were prepared as outlined above (*Immunoprecipitation with*  
628 *anti-FLAG antibody*) with F-AGO7, <sup>32</sup>P-labeled miR390\_21\_4SU, and TAS3-G21A-3M.  
629 The sample was transferred to Terasaki plate wells (7 µl/well) and exposed to > 300 nm  
630 UV radiation for 15 s using a UV crosslinker (SP-11 SPOT CURE, USHIO) with a  
631 uniform radiation lens (USHIO) and a long-path filter (300 nm, ASAHI SPECTRA) at 3  
632 cm from the light. For input sample, aliquots of reaction mixture were transferred into a  
633 new tube, and mixed with 4×SDS-PAGE sample buffer. For FLAG-IP, the reaction  
634 mixture was incubated with Dynabeads protein G coated with anti-FLAG antibody on a  
635 rotator at 4°C for 1 h. For SGS3-IP, the reaction mixture was first incubated with anti-

636 NtSGS3 antibody at 4°C for 1 h, then with Dynabeads protein G at 4°C for another 1 h.  
637 The tube was then placed on a magnetic stand to transfer the supernatant into a new tube,  
638 which was then mixed with 4×SDS-PAGE sample buffer. The beads were washed three  
639 times with 1×lysis buffer containing 800 mM NaCl and 1% Triton-X 100. After removing  
640 the buffer completely, 1×SDS-PAGE sample buffer was added to the beads. The samples  
641 (input, supernatant, and beads) were heated for 5 min and used for SDS-PAGE. After  
642 drying, the gel was exposed to a phosphor imaging plate.

643

#### 644 **Agrobacterium-based transient expression in *Nicotiana benthamiana***

645 The *Nicotiana benthamiana* infiltration assay was performed as previously described<sup>21</sup>.  
646 Briefly, pAT006 and pMDC- plasmids were introduced into *Agrobacterium tumefaciens*  
647 GV3101 (pMP90). The *Agrobacterium* cells transformed with TAS3 constructs, AGO7,  
648 and miR390 or empty vector (pAT006) were pooled at a ratio of 1:1:2 (total optical  
649 density at 600 nm (OD600) = 1.0). The leaves were harvested at ~48 h post-infiltration.  
650 Total RNA was extracted using Trizol reagent (Thermo Fisher Scientific).

651

#### 652 **Data availability**

653 All sequencing data are publicly available in DDBJ, under the accession number  
654 DRA010034 (currently undisclosed). All other data are available from the authors upon  
655 reasonable request.

656

#### 657 **Methods references**

- 658 1. Tomari, Y. & Iwakawa, H. O. In Vitro Analysis of ARGONAUTE-Mediated  
659 Target Cleavage and Translational Repression in Plants., *Methods Mol Biol* **1640**,  
660 55-71 (2017).
- 661 2. Peragine, A., Yoshikawa, M., Wu, G., Albrecht, H. L. & Poethig, R. S. SGS3 and  
662 SGS2/SDE1/RDR6 are required for juvenile development and the production of  
663 trans-acting siRNAs in Arabidopsis., *Genes Dev* **18**, 2368-2379 (2004).
- 664 3. McGlincy, N. J. & Ingolia, N. T. Transcriptome-wide measurement of translation  
665 by ribosome profiling., *Methods* **126**, 112-129 (2017).
- 666 4. Kurihara, Y. et al. Transcripts from downstream alternative transcription start sites  
667 evade uORF-mediated inhibition of gene expression in Arabidopsis., *Proc Natl*  
668 *Acad Sci U S A* **115**, 7831-7836 (2018).
- 669 5. Kozomara, A. & Griffiths-Jones, S. miRBase: integrating microRNA annotation  
670 and deep-sequencing data., *Nucleic Acids Res* **39**, D152-7 (2011).
- 671 6. Kozomara, A. & Griffiths-Jones, S. miRBase: annotating high confidence  
672 microRNAs using deep sequencing data., *Nucleic Acids Res* **42**, D68-73 (2014).
- 673 7. Dai, X. & Zhao, P. X. psRNATarget: a plant small RNA target analysis server.,  
674 *Nucleic Acids Res* **39**, W155-9 (2011).
- 675 8. Dai, X., Zhuang, Z. & Zhao, P. X. psRNATarget: a plant small RNA target  
676 analysis server (2017 release)., *Nucleic Acids Res* **46**, W49-W54 (2018).
- 677 9. Langmead, B. & Salzberg, S. L. Fast gapped-read alignment with Bowtie 2., *Nat*  
678 *Methods* **9**, 357-359 (2012).
- 679 10. Li, H. et al. The Sequence Alignment/Map format and SAMtools., *Bioinformatics*  
680 **25**, 2078-2079 (2009).
- 681 11. Quinlan, A. R. & Hall, I. M. BEDTools: a flexible suite of utilities for comparing  
682 genomic features., *Bioinformatics* **26**, 841-842 (2010).
- 683 12. Mine, A. et al. Identification and characterization of the 480-kilodalton template-  
684 specific RNA-dependent RNA polymerase complex of *Red clover necrotic mosaic*  
685 *virus*., *J Virol* **84**, 6070-6081 (2010).
- 686 13. Endo, Y., Iwakawa, H. O. & Tomari, Y. Arabidopsis ARGONAUTE7 selects  
687 miR390 through multiple checkpoints during RISC assembly., *EMBO Rep* **14**,  
688 652-658 (2013).
- 689 14. Iwakawa, H. O. & Tomari, Y. Molecular Insights into microRNA-Mediated  
690 Translational Repression in Plants., *Mol Cell* **52**, 591-601 (2013).



- 691 15. Tsuzuki, M., Takeda, A. & Watanabe, Y. Recovery of dicer-like 1-late flowering  
692 phenotype by miR172 expressed by the noncanonical DCL4-dependent biogenesis  
693 pathway., *RNA* **20**, 1320-1327 (2014).
- 694 16. Curtis, M. D. & Grossniklaus, U. A gateway cloning vector set for high-  
695 throughput functional analysis of genes in planta., *Plant Physiol* **133**, 462-469  
696 (2003).
- 697 17. Montgomery, T. A. et al. Specificity of ARGONAUTE7-miR390 interaction and  
698 dual functionality in TAS3 trans-acting siRNA formation., *Cell* **133**, 128-141  
699 (2008).
- 700 18. Baeg, K., Iwakawa, H. O. & Tomari, Y. The poly(A) tail blocks RDR6 from  
701 converting self mRNAs into substrates for gene silencing., *Nat Plants* **3**, 17036  
702 (2017).
- 703 19. Yoshikawa, M. et al. 3' fragment of miR173-programmed RISC-cleaved RNA is  
704 protected from degradation in a complex with RISC and SGS3., *Proc Natl Acad*  
705 *Sci U S A* **110**, 4117-4122 (2013).
- 706 20. Pall, G. S. & Hamilton, A. J. Improved northern blot method for enhanced  
707 detection of small RNA., *Nat Protoc* **3**, 1077-1084 (2008).
- 708 21. Llave, C., Kasschau, K. D. & Carrington, J. C. Virus-encoded suppressor of  
709 posttranscriptional gene silencing targets a maintenance step in the silencing  
710 pathway., *Proc Natl Acad Sci U S A* **97**, 13401-13406 (2000).

711

712

---

713 **Acknowledgements**

714 We thank James Carrington for providing *Nicotiana benthamiana* seed, *Agrobacterium*  
715 *tumefaciens* GV3101, pMDC32, pMDC32-3×HA-AGO7, pMDC32-TAS3a and a  
716 detailed protocol for *Agrobacterium* infiltration, Yukio Kurihara for *Arabidopsis thaliana*  
717 (Col-0) seeds, Koreaki Ito and Yuhei Chadani for helpful advice on neutral pH gel  
718 electrophoresis analyses, Yuichi Shichino and Mari Mito for technical assistance on  
719 ribosome profiling, Keisuke Shoji for kind advice and assistance on NGS data analyses,  
720 and Kyungmin Baeg and Yayoi Endo for plasmid construction. We also thank all the  
721 members of the Tomari laboratory for discussion and critical comments on the manuscript.  
722 We also thank Life Science Editors for editorial assistance. This work was supported in  
723 part by JST, PRESTO (grant JPMJPR18K2 to H.-o.I.), Grant-in-Aid for Scientific  
724 Research on Innovative Areas ('Nascent-chain Biology') (grant 26116003 to H.-o.I.), and  
725 Grant-in-Aid for Scientific Research (B) (grant 18H02380 to M.Y.). DNA libraries were  
726 sequenced by the Vincent J. Coates Genomics Sequencing Laboratory at UC Berkeley,  
727 supported by an NIH S10 OD018174 Instrumentation Grant.

728

729 **Author Contributions**

730 H.-o.I. conceived of the project and designed the experiments; H.-o.I. and T.F. performed  
731 ribosome profiling and bioinformatic analyses with the supervision of S.I; H.-o.I., A.L.,  
732 and K.K. performed biochemical analyses; A.M. and A.T. performed transient expression  
733 assays in *Nicotiana benthamiana*; H.-o.I., S.I. and Y.T. wrote the manuscript with editing  
734 from all the authors; all the authors discussed the results and approved the manuscript.

735 **Competing interests**

736 Authors declare no competing interests.

737 **Corresponding author**

738 Correspondence and requests for materials should be addressed to Hiro-oki Iwakawa

739 (iwakawa@iqb.u-tokyo.ac.jp)

740 \_\_\_\_\_

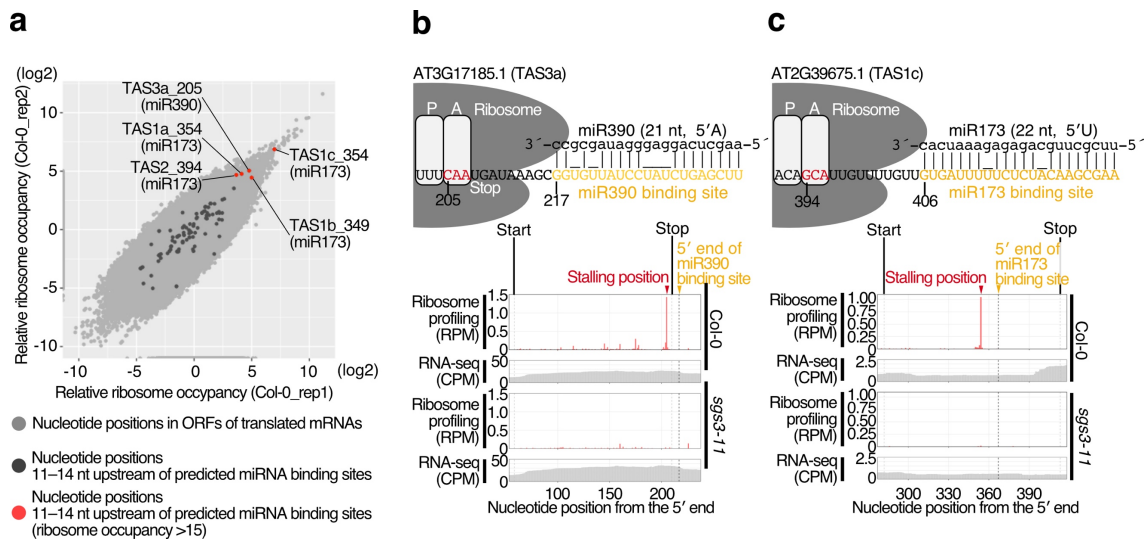

741  
742  
743  
744  
745  
746  
747  
748  
749  
750  
751  
752  
753

**Fig. 1. The dsRNA-binding protein SGS3 promotes microRNA-mediated ribosome stalling.** (a) Scatter plot showing correlation of relative ribosome occupancy (Materials and Methods) between replicates (Col-0\_rep1 and 2). The nucleotide positions with ribosome footprints (reads per million (RPM) over 0.05) in translating ORFs are shown in light gray. The nucleotide positions 11–14 nucleotide upstream of predicted miRNA binding sites are shown in dark gray (Supplementary Table 1). In such positions, those with relative ribosome occupancy over 15 are shown in red (Supplementary Table 1). (b, c) Ribosome footprints (A-site position) in RPM and RNA-seq in coverage per million (CPM) in wild-type or *sgs3-11* mutant seedlings are shown for the following transcripts: (b) AT3G17185.1 (TAS3a), a precursor of trans acting siRNAs (tasiRNAs) with miR390 binding sites; (c) AT2G39675.1 (TAS1c), a precursor of tasiRNAs with a miR173 binding site. See also Extended Data Fig.1 and Supplementary Table 1.

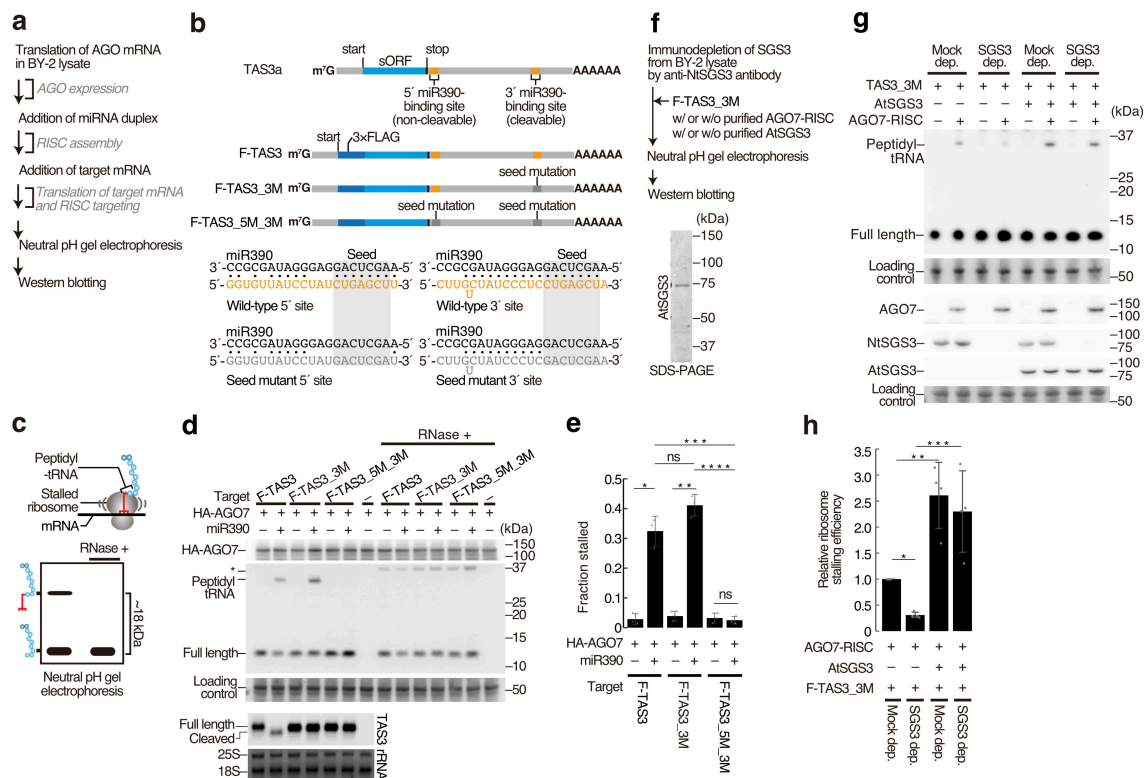

754

755

756

757

758

759

760

761

762

763

764

765

766

767

768

769

770

771

772

773

774

775

776

777

778

779

780

781

**Fig. 2. In vitro recapitulation of microRNA-mediated ribosome stalling.**

(a) Flowchart of the miRNA-mediated ribosome stalling assay *in vitro*. (b) (top) Schematic representation of TAS3a RNA and its 3×FLAG-tag fused variants. The orange and gray boxes indicate wild-type and seed-mutant miR390-binding sites, respectively. (bottom) The base-pairing configurations between miR390 and the wild-type or seed mutated miR390-binding sites. Seed sequences are shown in the shaded boxes. (c) Schematic representation of SDS-PAGE in a neutral pH environment, to thus detect peptidyl-tRNAs. (d) Both AGO7-RISC and the 5' binding site are required for ribosome stalling *in vitro*. After *in vitro* silencing assay, half of the reaction mixture was treated with RNase (RNase +), and used for PAGE followed by Western blotting. The full-length polypeptide and peptidyl-tRNA were detected by anti-FLAG antibody. 3×HA-AGO7 (HA-AGO7) was detected by anti-HA antibody. Total protein was stained using Ponceau S, and the ~50 kDa bands were used as a loading control. The asterisk indicates the positions of the unexpected protein bands that appears with RNase treatment. (bottom) Northern blotting of TAS3 variants. Methylene blue-stained rRNA was used as a loading control. (e) Quantification of ribosome stalling efficiencies in (d). Fraction stalled was calculated using the following formula: Fraction stalled = peptidyl-tRNA/(full-length + peptidyl-tRNA). The mean values ± SD from three independent experiments are shown. Bonferroni-corrected P values from two-sided paired t-tests are as follows: \*P = 0.03361; \*\*P = 0.03817; \*\*\*P = 0.03809, \*\*\*\*P = 0.03174. (f) (top) Flowchart of the *in vitro* miRNA-mediated ribosome stalling assay with SGS3-immunodepleted lysate. (bottom) Coomassie brilliant blue staining of purified AtSGS3. (g) SGS3 promotes miRNA-mediated ribosome stalling *in vitro*. Endogenous NtSGS3, recombinant AtSGS3, and recombinant AGO7 were detected using anti-NtSGS3, anti-AtSGS3, and anti-AtAGO7 antibodies, respectively. See also Fig. 2d legend. (h) Quantification of relative ribosome stalling efficiencies in (g). The signal intensity of peptidyl-tRNA/(full-length + peptidyl-tRNA) was normalized to the value of Mock dep. (AtSGS3 –). The mean values ± SD from four independent experiments are shown. Bonferroni-corrected P values from two-sided paired t-tests are as follows: \*P = 0.00039; \*\*P = 0.04433; \*\*\*P = 0.03889.

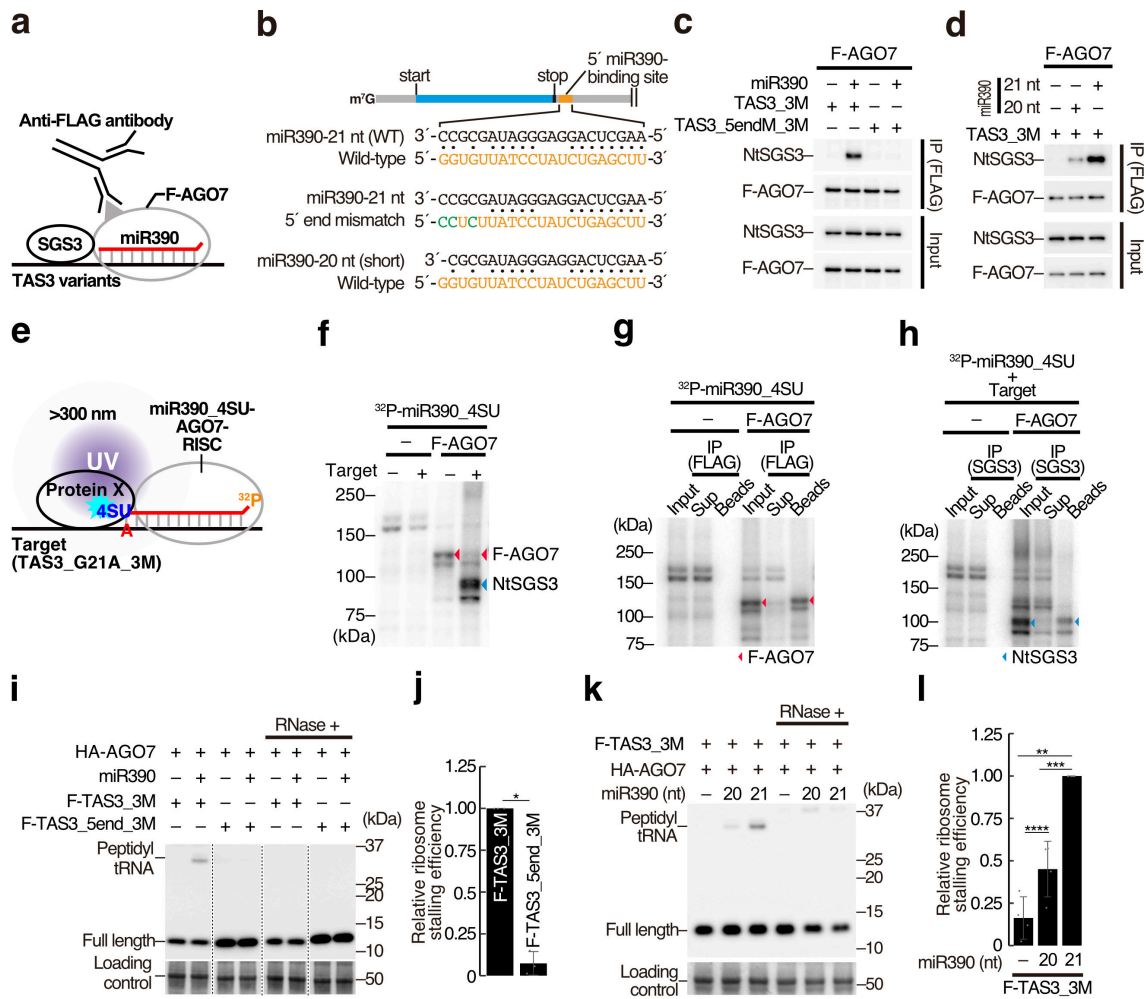

**Fig. 3. SGS3 binding to the 3' end of miR390 is required for the ribosome pausing.**

(a) Schematic representation of co-immunoprecipitation assay with anti-FLAG antibody in the presence of F-AGO7, miR390, and TAS3 variants. (b) Base-pairing configurations. (top) miR390 and wild-type 5' miR390-binding site. (middle) miR390 and 5' site with 5' end mismatches (5endM). (bottom) 20-nt miR390 and the wild-type 5' site. The mutated nucleotides are shown in green. (c) 5' end mismatches in the 5' site disrupt interaction between SGS3 and AGO7. (d) The use of a short miR390 variant (20 nt) disrupted interaction between SGS3 and AGO7. (e) An overview of the UV crosslink experiment. AGO7 was programmed with the 5'-radiolabeled miR390 variant bearing the 3' 4-thio-U (<sup>32</sup>P-miR390\_4SU) in BY-2 lysate, and further incubated with the TAS3 variant (TAS3\_G21A\_3M). The reaction mixture was analyzed using 10% SDS-PAGE and crosslinked proteins were detected using phosphorimaging. The ellipse indicates neighboring proteins. (f) miR390-loaded AGO7 directly interacts with NtSGS3 in the presence of TAS3\_G21A\_3M. 5' end-radiolabeled miR390 with a 3' 4-thio-U was incubated in BY-2 lysate in the presence or absence of F-AGO7 and target RNA (TAS3\_G21A\_3M), crosslinked by UV light (>300 nm), then analyzed by SDS-PAGE. The red and blue arrowheads indicate AGO7 and NtSGS3, respectively (See also g and h). (g) Detection of F-AGO7 by UV crosslinking. The 5' end-radiolabeled miR390 with a 3' 4-thio-U was incubated in BY-2 lysate in the presence of F-AGO7, crosslinked by UV light (>300 nm), immunoprecipitated using anti-FLAG antibody, and then analyzed by SDS-PAGE. F-AGO7 was efficiently crosslinked to 4-thio-U at the 3' end of miR390. (h) Detection of NtSGS3 by UV crosslinking. 5' end-radiolabeled miR390 with a 3' 4-thio-U was incubated in BY-2 lysate in the presence of F-AGO7 and target RNA (TAS3\_G21A\_3M), crosslinked by UV light (>300 nm),

782  
783  
784  
785  
786  
787  
788  
789  
790  
791  
792  
793  
794  
795  
796  
797  
798  
799  
800  
801  
802  
803  
804

805 immunoprecipitated by anti-NtSGS3 antibody, and then analyzed by SDS-PAGE. NtSGS3 was  
806 efficiently crosslinked to 4-thio-U at the 3' end of miR390 in the presence of the target RNA. (i) and  
807 (k) *in vitro* ribosome stalling experiments. Mismatches at the 5' end of miR390-binding site or the use  
808 of 20-nt miR390 decreased stalled ribosomes. See also the legend of Fig.2d. (j) and (l) Quantification  
809 of relative ribosome stalling efficiencies in (i) and (k), respectively. The signal intensity of peptidyl-  
810 tRNA/(full-length + peptidyl-tRNA) was normalized to the value of F-TAS3\_3M (i) or miR390 (21  
811 nt) (k). The mean values  $\pm$  SD from three (j) and four (l) independent experiments are shown,  
812 respectively. P value from two-sided paired t-tests are as follows: \*P = 0.00190 (j). Bonferroni-  
813 corrected P values from two-sided paired t-tests are as follows: \*\*P = 0.00270; \*\*\*P = 0.02034; \*\*\*\*P  
814 = 0.04343 (l).  
815



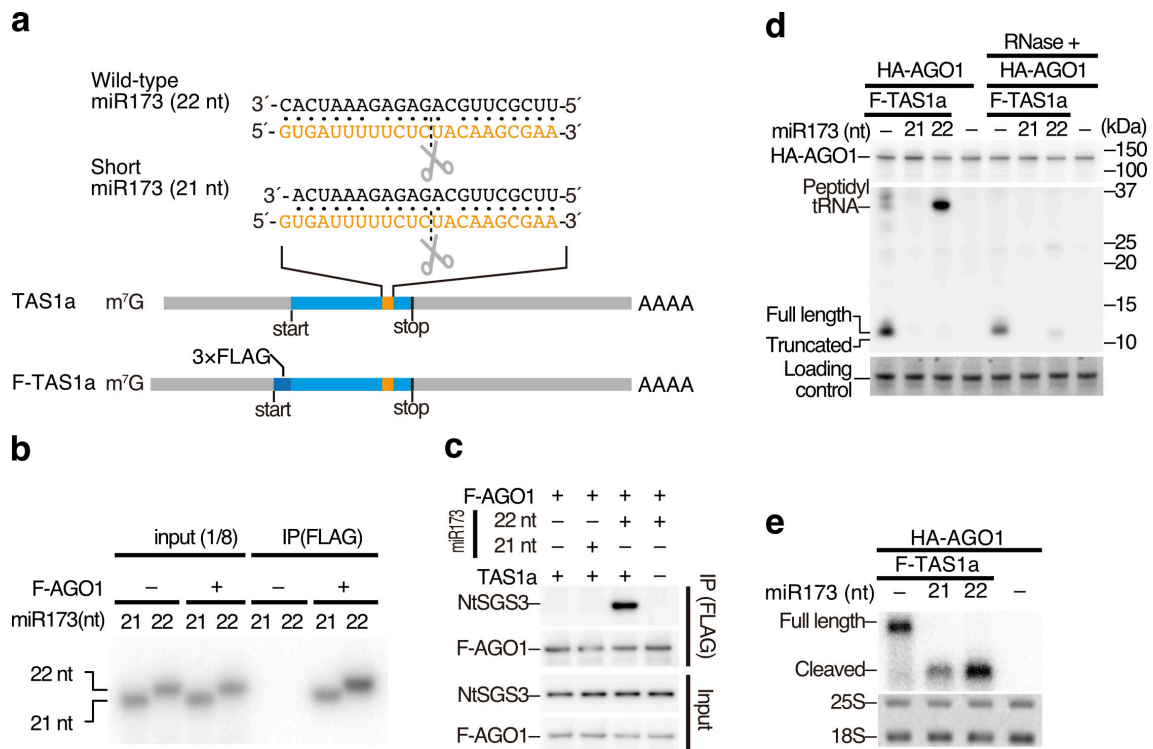

816  
817  
818  
819  
820  
821  
822  
823  
824  
825  
826  
827  
828  
829  
830  
831  
832

**Fig. 4. AGO1 loaded with 22-nt miR173 efficiently stalls ribosome.** (a) (top) Base-pairing configurations between 22/21-nt miR173 and the miR173-binding site in TAS1a. (bottom) Schematic representation of TAS1a RNA and its 3×FLAG-tag fused variant. (b) *In vitro* RISC assembly with AGO1 and radiolabeled 21 and 22-nt miR173 duplexes. After translation of 3×FLAG-AGO1 (F-AGO1) mRNA *in vitro*, the radiolabeled miR173 duplex was added and further incubated for RISC assembly. Then, F-AGO1 was immunoprecipitated with anti-FLAG antibody. The co-immunoprecipitated miR173 was analyzed by denaturing PAGE. Both 21- and 22-nt miR173 duplexes were incorporated into AGO1. (c) Co-immunoprecipitation experiments with 3×FLAG-AGO1 in the presence of 21 or 22-nt miR173 duplex and TAS1a RNA. AGO1-RISC loaded with 22-nt miR173 interacts with NtSGS3 in the presence of TAS1a RNA. In contrast, 21-nt miR173 failed to promote the interaction between AGO1 and NtSGS3. (d) *In vitro* ribosome stalling experiments. Peptidyl-tRNA was accumulated in the presence of AGO1-RISC loaded with 22-nt miR173, while no peptidyl-tRNA was observed in the presence of that with 21-nt miR173. (e) Northern blotting of TAS1 reporter RNAs. TAS1 was efficiently cleaved by AGO1-RISC loaded with 21- and 22-nt miR173. Methylene blue-stained rRNA was used as a loading control.



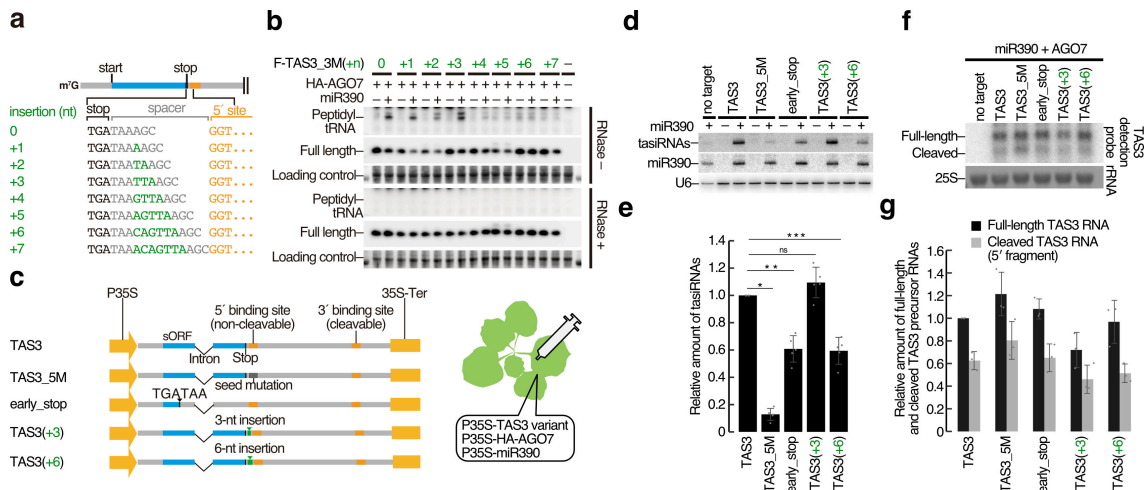

833  
834  
835  
836  
837  
838  
839  
840  
841  
842  
843  
844  
845  
846  
847  
848  
849  
850  
851  
852  
853  
854  
855  
856  
857

**Fig. 5. Ribosome stalling enhances production of secondary siRNAs.**

(a) Schematic representation of TAS3 variants with different nucleotide insertions (green) between the stop codon (black) and the 5' miR390-binding site (orange). (b) *In vitro* ribosome stalling experiments. Insertions of over 3 nucleotides decreased stalled ribosomes. After *in vitro* silencing assay, half of the reaction mixture was treated with RNase (RNase +), and used for PAGE followed by Western blotting. The full-length polypeptide and peptidyl-tRNA were detected by anti-FLAG antibody. Total protein was stained using Ponceau S, and the ~50 kDa bands were used as a loading control. (c) Schematic representation of plasmids carrying TAS3 variants used in the *Nicotiana benthamiana* (*N. benthamiana*) transient assay. P35S and 35S-Ter indicate Cauliflower mosaic virus (CaMV) 35S promoter and terminator, respectively. Leaves of *N. benthamiana* plants were infiltrated with a mixture of *Agrobacterium tumefaciens* cultures harboring P35S-HA-AGO7, P35S-TAS3 variants, and P35S-miR390 or empty vector. Leaves were harvested at 2-day post infiltration and used for Northern blotting to detect secondary siRNAs and the sense strand of TAS3 mRNAs. (d) Northern blotting of secondary siRNAs from TAS3 and its variants, miR390, and U6 RNAs. (e) Quantification of the secondary siRNAs in (d). The signal intensity of tasiRNAs was calibrated with miR390, and normalized to the value of TAS3 (miR390 +). The mean values  $\pm$  SD from five independent experiments are shown. Bonferroni-corrected P values from two-sided paired t-tests are as follows: \*P = 5.96313E-06; \*\*P = 0.00332; \*\*\*P = 0.00329. A positive correlation was observed between tasiRNA biogenesis and miR390-mediated ribosome stalling. (f) Northern blotting of the full-length TAS3 RNAs and the 5' cleaved fragments. Methylene blue-stained rRNA was used as a loading control. (g) The signal intensity of TAS3 RNA/rRNA was normalized to the value of full-length TAS3. The mean values  $\pm$  SD from three independent experiments are shown. No correlation was observed between ribosome stalling and accumulation of the sense strand of TAS3 RNAs.

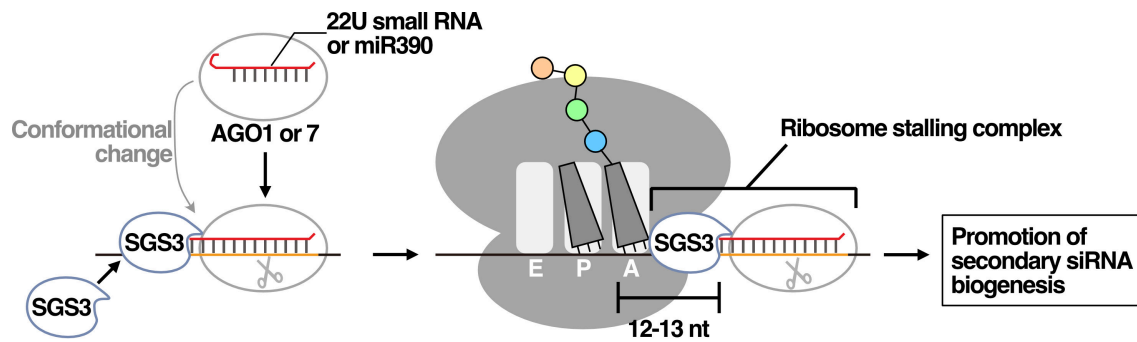

858  
859  
860  
861  
862  
863  
864  
865  
866

**Fig. 6. A model for ribosome stalling caused by SGS3-miRNA-Argonaute complex and its role in secondary siRNA biogenesis.**

Target binding causes dynamic conformational changes in 22U-AGO1-RISC or miR390-AGO7-RISC, resulting in protrusion of the 3' end of the small RNA from the RISC complex. SGS3 directly binds the dsRNA formed between the 3' side of the small RNA and the 5' side of the target site. The SGS3-small RNA complex stalls ribosomes at 12–13 nt upstream of the binding sites. This ribosome stalling stimulates secondary siRNA production in a manner different from mRNA stabilization.

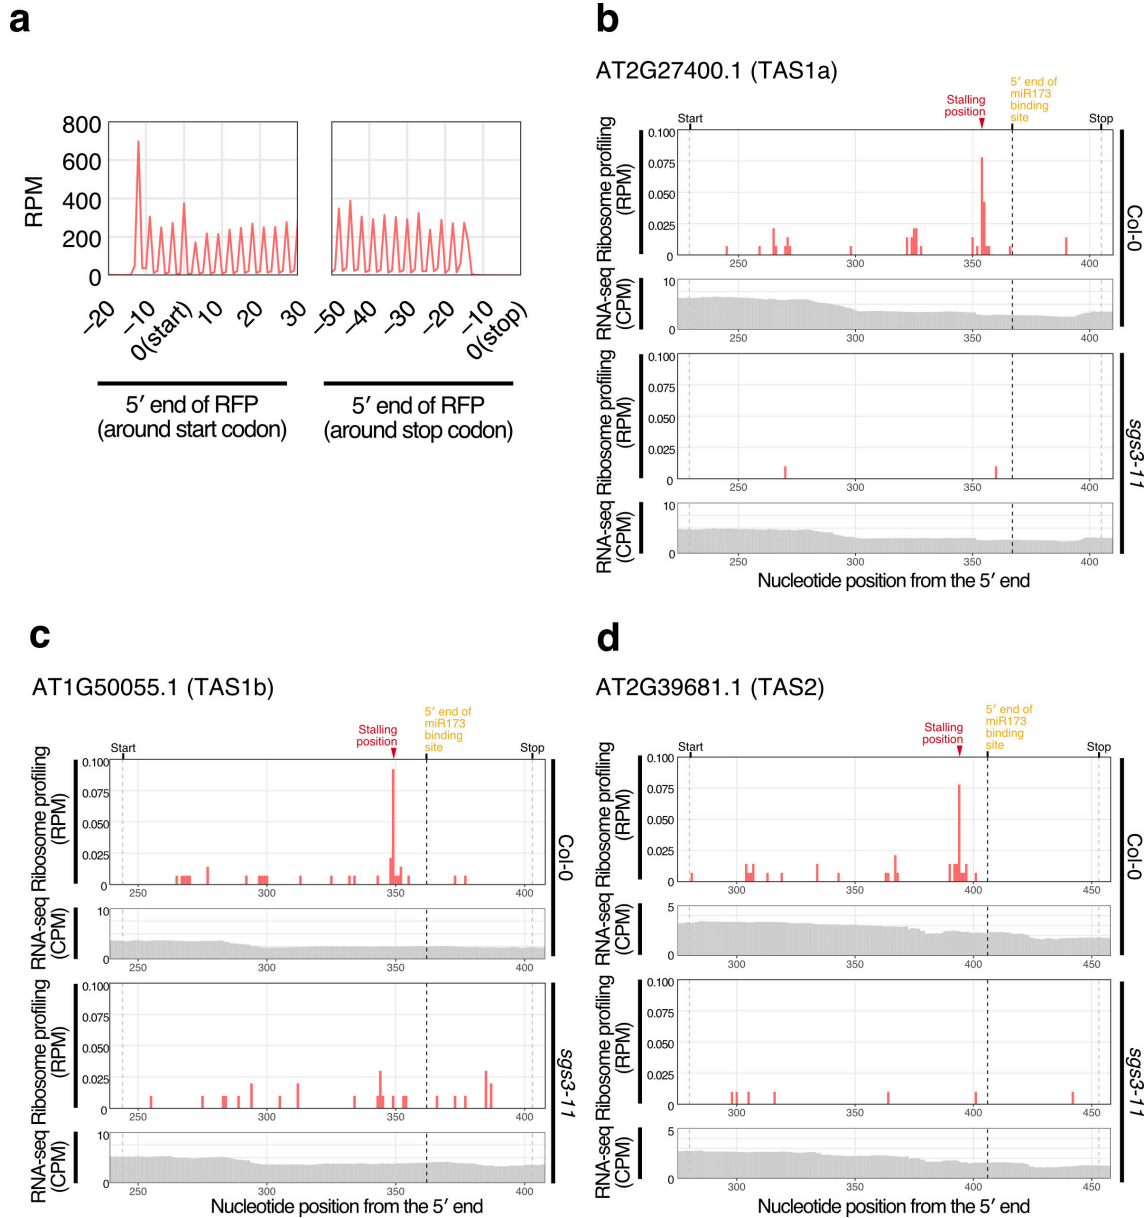

867

868

869

870

871

872

873

874

875

876

**Extended Data Fig. 1. Representative ribosome stalling positions with a downstream miRNA-binding site.** (a) Ribosome occupancies around start (left) and stop (right) codons using 28 nt foot prints for 3 day old seedlings of wild-type *Arabidopsis thaliana* (Col-0). The traces indicate 5' end of ribosome footprints. Ribosome footprints (A-site positions) in RPM and RNA-seq in CPM in 3 day old wild-type or *sgs3-11* mutant seedlings are shown for the following transcripts: (b) AT2G27400.1 (TAS1a), encoding one of the isoforms of TAS1; (c) AT1G50055.1 (TAS1b) encoding one of the isoforms of TAS1; (d) AT2G39681.1 (TAS2) encoding a precursor of tasiRNAs with a miR173 binding site. Related to Figs. 1b and c.

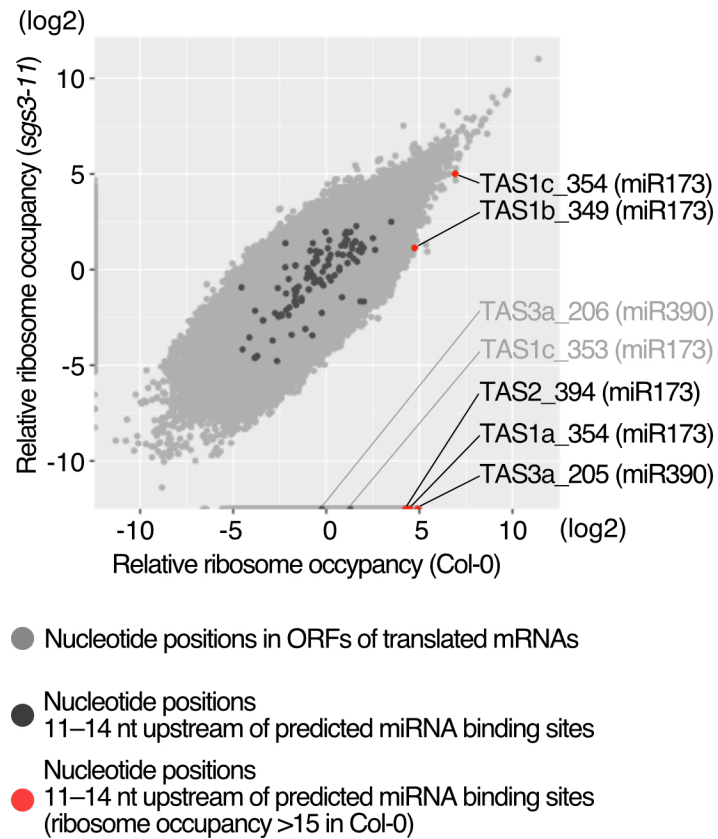

877

878

879

880

881

882

883

**Extended Data Fig. 2. SGS3 is not a general ribosome stalling factor, but rather a specific stalling enhancer for miRNA-mediated ribosome stalling.**

A scatter plot shows the relative ribosome occupancy (Materials and Methods) between Col-0 and *sgs3-11* seedlings. The nucleotide positions with ribosome footprints (RPM over 0.05 in Col-0 or *sgs3-11*) in translating ORFs are shown in light gray. See also the legend of Fig. 1a.

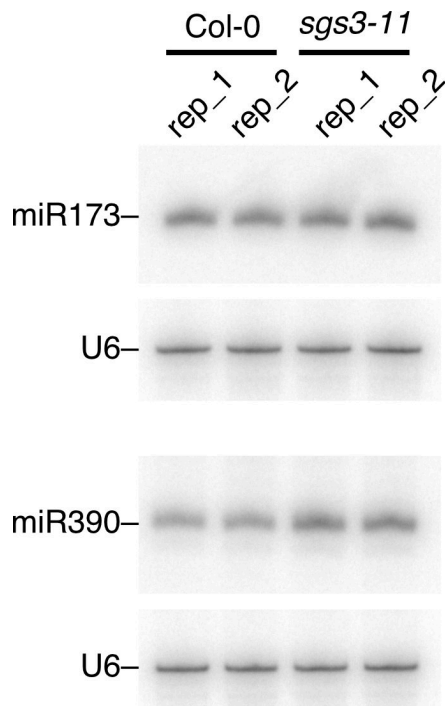

884

885

886 **Extended Data Fig. 3. miR173 and miR390 abundance in Col-0 and *sgs3-11* seedlings.**

887 miR173 and miR390 in wild-type (Col-0) and *sgs3-11* seedlings were detected by Northern blotting.

888 U6 RNA was used as a loading control.

889

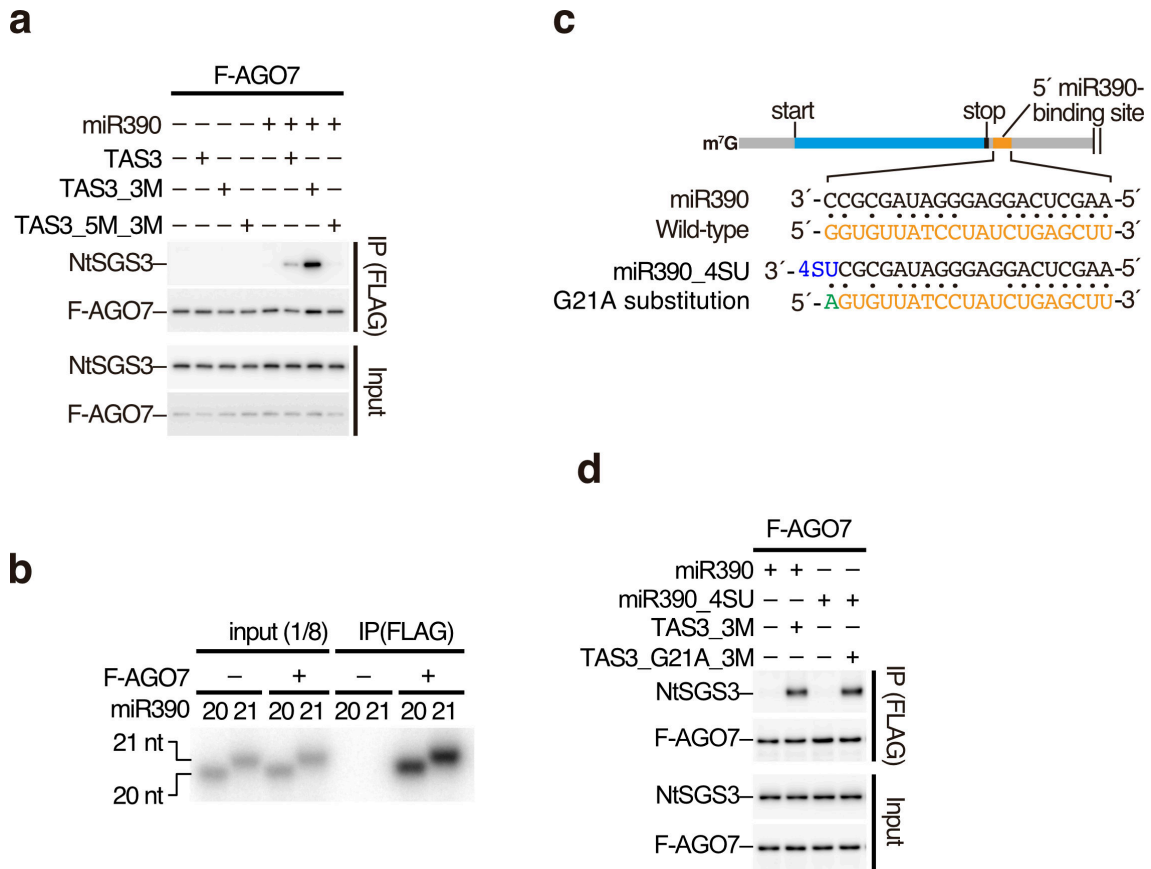

890  
 891  
 892  
 893  
 894  
 895  
 896  
 897  
 898  
 899  
 900  
 901  
 902  
 903  
 904  
 905

**Extended Data Fig. 4. Co-immunoprecipitation of NtSGS3 with AGO7 in the presence of TAS3 variants, and AGO7-RISC assembly with 21-nt and 20-nt miR390.** (a) NtSGS3 was specifically co-immunoprecipitated with F-AGO7 in the presence of miR390 duplex and TAS3 or the TAS3-3M. The reason why more SGS3 was co-immunoprecipitated in TAS3\_3M than wild-type TAS3 is because the wild-type TAS3 mRNA is cleaved at the 3' binding site by AGO7-RISC, thereby destabilized in the lysate as shown in Fig. 2d. (b) *In vitro* RISC assembly with F-AGO7 and radiolabeled 20 and 21-nt miR390 duplexes. After RISC assembly, F-AGO7 was immunoprecipitated with anti-FLAG antibody. The co-immunoprecipitated miR390 was analyzed by denaturing PAGE. Both 20- and 21-nt miR390 duplexes were efficiently incorporated into AGO7. (c) Schematic of base-pairing configurations between miR390-4SU and a 5' miR390-binding site with a G21A substitution. The mutated nucleotides in TAS3 variant are shown in green. 4-thiouridine is shown in blue. (d) AGO7-RISC loaded with 21-nt miR390 variant possessing 4-thiouridine at the 3' end (miR390\_4SU) efficiently interacts with NtSGS3 in the presence of TAS3 variant with a compensatory G-to-A mutation at the 5' end of miR390 binding site (TAS3\_G21A\_3M).

**a**

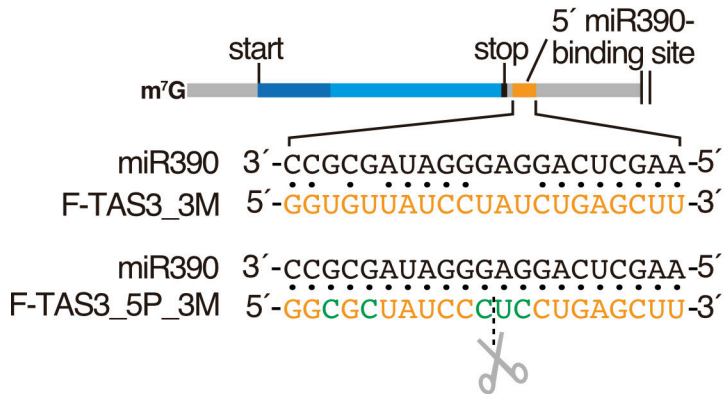

**b**

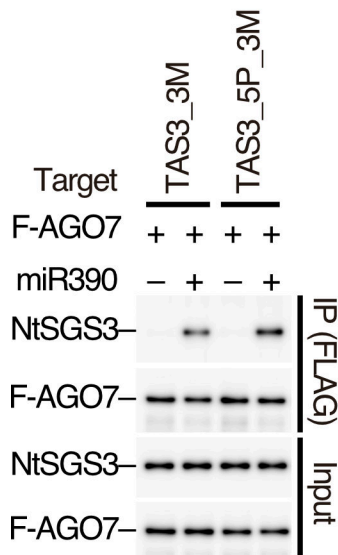

**c**

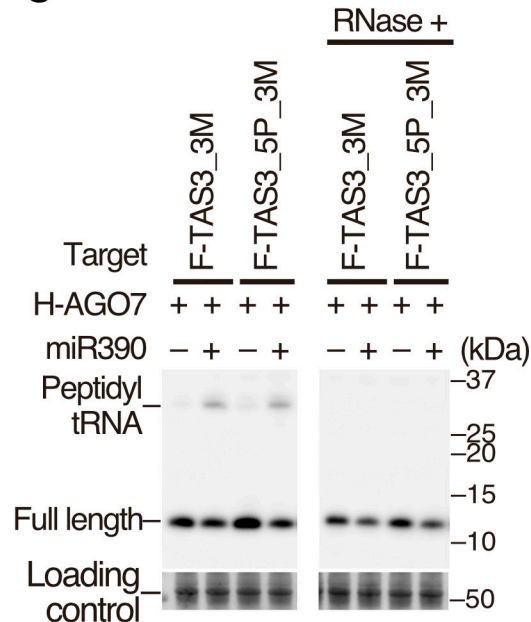

906

907

908 **Extended Data Fig. 5. A cleavable target site facilitates ribosome stalling mediated by the**

909 **miR390-AGO7 RISC.** (a) Schematic of base-pairing configurations between miR390 and a 5' target

910 site with perfect complementarity to miR390. The mutated nucleotides in the TAS3 variant (F-

911 TAS3\_3M variant) are shown in green. (b) Co-immunoprecipitation experiments. AGO7-RISC

912 efficiently interacts with SGS3 in the presence of a F-TAS3\_3M variant with a 5' target site with

913 perfect complementarity to miR390 (F-TAS3\_5P\_3M). (d) *In vitro* ribosome stalling experiments.

914 Peptidyl-tRNA was accumulated in the presence of AGO7-RISC and F-TAS3\_5P\_3M, suggesting

915 that cleavable site facilitates ribosome stalling mediated by miR390-AGO7-RISC.

916  
917  
918  
919  
920  
921  
922  
923  
924  
925  
926  
927  
928  
929  
930  
931  
932  
933  
934  
935

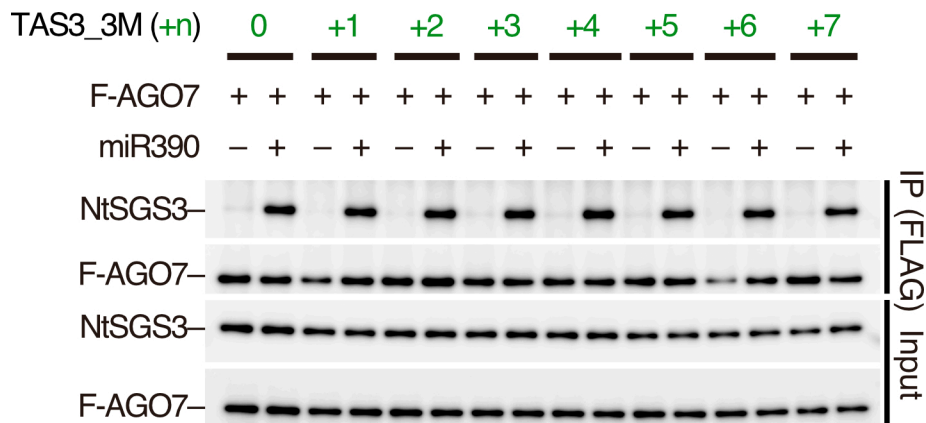

**Extended Data Fig. 6. Nucleotide insertion between the stop codon and the 5' miR390 binding site has no effect on the interaction between AGO7 and NtSGS3.** NtSGS3 was specifically and efficiently co-immunoprecipitated with F-AGO7 in the presence of miR390 duplex and TAS3 variants with nucleotide insertions between the stop codon and the 5' miR390-binding site.



- 936 **Supplementary Table 1. Nucleotide positions 11–14 nt upstream of predicted miRNA binding**  
937 **sites.**  
938  
939 **Supplementary Table 2. List of TAS3 homologs.**  
940  
941 **Supplementary Table 3. List of synthetic RNA oligos used in this study.**  
942  
943 **Supplementary Table 4. List of synthetic DNA oligos and long DNA fragments used in this study.**  
944  
945



**Supplementary Table 2. List of TAS3 homologs.**

| Species                              | TAS3 homolog | Accession   | Clade      | Cleavable (Yes/No) | nts between stop codon and the 5' end of miR390 binding site | ORF length | aa length |
|--------------------------------------|--------------|-------------|------------|--------------------|--------------------------------------------------------------|------------|-----------|
| <i>Arabidopsis thaliana</i>          | TAS3a        | AT3G17185   | eudicots   | No                 | 6                                                            | 153        | 50        |
| <i>Arabidopsis thaliana</i>          | TAS3b        | AT5G49615   | eudicots   | No                 | 10                                                           | 129        | 42        |
| <i>Arabidopsis thaliana</i>          | TAS3c        | AT5G57735   | eudicots   | No                 | 9                                                            | 150        | 49        |
| <i>Antirrhinum majus</i>             | TAS3         | AJ797948.1  | eudicots   | No?                | 3                                                            | 195        | 64        |
| Burma mangrove                       | TAS3         | BP947370.1  | eudicots   | No?                | 9                                                            | 213        | 70        |
| <i>Glycine max</i>                   | TAS3         | BE330988.1  | eudicots   | No?                | 3                                                            | 168        | 55        |
| <i>Gossypium raimondii</i>           | TAS3         | CO077318.1  | eudicots   | Yes?               | 10                                                           | 132        | 43        |
| <i>Manihot esculenta</i>             | TAS3         | CK652751    | eudicots   | No?                | 3                                                            | 102        | 33        |
| <i>Mesembryanthemum crystallinum</i> | TAS3         | BF479835.1  | eudicots   | No?                | 9                                                            | 135        | 44        |
| <i>Populus trichocarpa</i>           | TAS3         | DT498974.1  | eudicots   | No?                | 6                                                            | 171        | 56        |
| <i>Solanum lycopersicum</i>          | TAS3-1       | NR_138079.1 | eudicots   | No?                | 62                                                           | 99         | 32        |
| <i>Solanum lycopersicum</i>          | TAS3-12      | JX047547.1  | eudicots   | Yes?/No?           | 10                                                           | 99         | 32        |
| Swingle citrumelo                    | TAS3         | CX663477.1  | eudicots   | No?                | 3                                                            | 156        | 51        |
| <i>Theobroma cacao</i>               | TAS3         | CA795323.1  | eudicots   | No?                | 3                                                            | 114        | 37        |
| <i>Vitis vinifera</i>                | TAS3         | DT025007.1  | eudicots   | No?                | 3                                                            | 180        | 59        |
| <i>Pinus taeda</i>                   | TAS3         | DR112999.1  | Gymnosperm | Yes                | ORF                                                          | 129        | 42        |
| <i>Hordeum vulgare</i>               | TAS3         | BF264964.3  | Monocots   | Yes?               | 10                                                           | 213        | 70        |
| <i>Oryza sativa Japonica</i>         | TAS3         | AU100890.1  | Monocots   | No?                | 9                                                            | 114        | 37        |
| <i>Saccharum</i>                     | TAS3         | CA145655.1  | Monocots   | Yes?               | ORF                                                          | 120        | 39        |
| <i>Sorghum bicolor</i>               | TAS3         | CD464142.1  | Monocots   | No?                | 9                                                            | 141        | 46        |
| <i>Triticum aestivum</i>             | TAS3         | CN010916.1  | Monocots   | No?                | 9                                                            | 177        | 58        |
| <i>Zea mays</i>                      | TAS3         | BE519095.1  | Monocots   | Yes?               | 14                                                           | 126        | 41        |
| <i>Physcomitrella patens</i>         | TAS3a        | BK005825    | moss       | Yes?               | 10                                                           | 162        | 53        |
| <i>Physcomitrella patens</i>         | TAS3b        | BK005826    | moss       | Yes?               | nd                                                           |            |           |
| <i>Physcomitrella patens</i>         | TAS3c        | BK005827    | moss       | Yes?               | nd                                                           |            |           |
| <i>Physcomitrella patens</i>         | TAS3d        | BK005828    | moss       | Yes?               | nd                                                           |            |           |

? (predicted from sequence)

**Supplementary Table 3. List of synthetic RNA oligos used in this study.**

| Name                    | Sequence (5'-3')          |
|-------------------------|---------------------------|
| miR390(21 nt)-guide     | AAGCUCAGGAGGGGAUAGCGCC(M) |
| miR390(21 nt)-passenger | CGCUAUCCAUCCUGAGUUUCA(M)  |
| miR390(20 nt)-guide     | AAGCUCAGGAGGGGAUAGCGC(M)  |
| miR390(20 nt)-passenger | GCUAUCCAUCCUGAGUUUCA(M)   |
| miR390_21_4SU           | AAGCUCAGGAGGGGAUAGCGC4(M) |
| miR173(22 nt)-guide     | UUCGCUUGCAGAGAGAAAUCAC(M) |
| miR173(22 nt)-passenger | GAUUCUCUGUGUAAGCGAACA(M)  |
| miR173(21 nt)-guide     | UUCGCUUGCAGAGAGAAAUCA(M)  |
| miR173(21 nt)-passenger | AUUUCUCUCAGCAACGCAUAG(M)  |

"(M)" indicates 2'-OMe modification.

Supplementary Table 4. List of synthetic DNA oligos and long fragments used in this study.

| Name                  | Sequence (5'-3')                                                                                                                                                                                                                                                                                                                                                                                                                                                                                                                                                                                                                                                                                                                                                                                                                                                                                                                                                                                                 |
|-----------------------|------------------------------------------------------------------------------------------------------------------------------------------------------------------------------------------------------------------------------------------------------------------------------------------------------------------------------------------------------------------------------------------------------------------------------------------------------------------------------------------------------------------------------------------------------------------------------------------------------------------------------------------------------------------------------------------------------------------------------------------------------------------------------------------------------------------------------------------------------------------------------------------------------------------------------------------------------------------------------------------------------------------|
| T7_ADH_SUTR_3+H4      | ATGCTTCGACGCTGACCTAGATAATACGACCTACTATAGGGT<br>ACATCCACATACACAAAACATAACAAGAAGCAAAAGCAAGT<br>TCTTCACGTGTGATAGGTTTACCCATACGATGCTGACTATG<br>CGGGCTATCCCTATGACGTCGCGGACTATGCAAGATCTATCC<br>ATATGACGTTCCAGATTACGCTCGTGGCGCCGACCTGAGA                                                                                                                                                                                                                                                                                                                                                                                                                                                                                                                                                                                                                                                                                                                                                                                   |
| T7_T43a               | CCCGGGTAATACGACTACTATAGGATCCACCGTTTCTAAG<br>ACTCTCTCTCTCTGTTTCTATTCTCTCTCTCAATGAAAG<br>AGAGAGAAGAGGCTCCATGATGAAATACGCGAGCCGAAGT<br>TCTCTGAGGCTTAAAGGAAGACATACTCTGCTGATGATG<br>AGATTATGGATCCGCTGCGAGACATGAGTTTCTCTCGG<br>CATTCAGTTTCAAAGTAAAGCCGGTGTATCTTACTGAGCT<br>TTAGCGGATTTTTTCTTCAATTTGTTTACTAGAGAT<br>GCATTTCAATTTCTTTTCTGACCTGTGAAGCCCTTTCTTG<br>ACCTGTGAAGCCCACTCTTCTAAACGTTTATTTTCTC<br>GTTTACAGATTCTTCTACTCTCTCAATAAGAAATAGATAT<br>CTACTCTCTCTTACTTCTGATGATCTTTCTGCGATCTG<br>TATCCCTCCTGAGCAATCCACATATCTTTGTTGTTAT<br>GATGTATGGTACATAAATCAATAAAGAAGTTCAGCTTTT<br>CTCTCGAG                                                                                                                                                                                                                                                                                                                                                                                                                              |
| T43a/PDS2             | TTCAATTTGAGAGGCTCGAGTTCGACATCCACCCTTCTAAG<br>ACTCTCTCTCTCTGTTTCTATTCTCTCTCTCAAGAAAG<br>AGAGAAGAAGGCTCCATGATGAAATACGCGAGCCGAAGT<br>TCTCCAAGGATATGCTCTACTGATATGATGATGAGAAAGT<br>TAGGGTTTTGCTATTCGAAATCAATTTTGTGTTGCTCAATA<br>ATGATATCTGATGATGAGAACACCTGAAAGATATGTTTAC<br>TGAACATATAAACAATGTTGTTTCTGATCTTCTTCTAT<br>ATATATGATGATGAGTGAAGTCTGTTATATAGACATTATCA<br>TGTGATCACTGATTAACCAATAAATTTGATCAATACTACT<br>TTTGATTTACGATGAGGTTTGAAGTACTTCTACTGCTGTT<br>TTTCCACATGATTTACAACATACATATATTTGGAATCAATA<br>TATACTGATATTAAGTTGAAAGAGTAAACAAGTCTTTTTC<br>AGGCATTAAGGAAACAATACTCCGCTGATGATGAGGATTA<br>TTGATATCCCTGTGCTGAGACATGATGTTTCTTGGGATCTC<br>AGTTTCAAGTAAAGCGGTTGATCTACTGAGCTTTGATC<br>GGATTTTCTTCTCAATATGTTTACTAGATGATGATTT<br>CATTTTCTCTTTAAGTACTACTCCCACTGAGAAAGT<br>GGAAACCAAAAATCTCTTCAAGTTTATATTTCTGTTT<br>TACAGATCTATCTACTCTCAATAAGAAATAGATATCTAT<br>CTTACTCTAAATGTTGAGGATCTTCTTCTACTGTTCTATC<br>CTCTCTGAGCTAACTCAACATATCTTTGTTGATGATG<br>TATGGTTGACATAAATCAATAAAGAAGTTCAGCTTTTCTACT<br>AGTTTACAGGCTGAAATCAACA |
| oligoK1               | GAACAGATTGGAGGTATGAGTCTAGGCTGGTCCAAATGCTCA<br>A                                                                                                                                                                                                                                                                                                                                                                                                                                                                                                                                                                                                                                                                                                                                                                                                                                                                                                                                                                  |
| oligoK2               | CCATGGGACGTCGACCTAGGTAATATAACCCCAATCACT<br>TCAATGTAAGGCCATGCT                                                                                                                                                                                                                                                                                                                                                                                                                                                                                                                                                                                                                                                                                                                                                                                                                                                                                                                                                    |
| oligoE1               | CTGGGCGCCATGGAAAGAAAACATCATCATCACTAC                                                                                                                                                                                                                                                                                                                                                                                                                                                                                                                                                                                                                                                                                                                                                                                                                                                                                                                                                                             |
| oligoE2               | GCTGGCGGCTCAGGAGTAAACATGAGATTCTTGAC                                                                                                                                                                                                                                                                                                                                                                                                                                                                                                                                                                                                                                                                                                                                                                                                                                                                                                                                                                              |
| oligoS12              | CTGTGATGCTGATCTGTTGAACTGATGATGATCTTTAATC<br>ACGCTATGGTCTTTGATGCT                                                                                                                                                                                                                                                                                                                                                                                                                                                                                                                                                                                                                                                                                                                                                                                                                                                                                                                                                 |
| oligo955              | TATAGGGAGACCCAAAGCTGGCGGCTAGGACTACAAGACC                                                                                                                                                                                                                                                                                                                                                                                                                                                                                                                                                                                                                                                                                                                                                                                                                                                                                                                                                                         |
| oligo1039             | ACCTCAATCTGTTCCGGT                                                                                                                                                                                                                                                                                                                                                                                                                                                                                                                                                                                                                                                                                                                                                                                                                                                                                                                                                                                               |
| oligo1044             | AACCACCTATCTACATACCAAGATATGGGACATCATCAT<br>CATCACATGGACGAGAAGCCACCGG                                                                                                                                                                                                                                                                                                                                                                                                                                                                                                                                                                                                                                                                                                                                                                                                                                                                                                                                             |
| oligo1062             | CTCGGAAATGCACTAGATCCGCGTAAACGACTCATATAG<br>GA                                                                                                                                                                                                                                                                                                                                                                                                                                                                                                                                                                                                                                                                                                                                                                                                                                                                                                                                                                    |
| oligo1063             | TTGAGAGAGAGAAATAGA                                                                                                                                                                                                                                                                                                                                                                                                                                                                                                                                                                                                                                                                                                                                                                                                                                                                                                                                                                                               |
| oligo1064             | GTTTCTATTTCTCTCTCAATGGACTACAAGACCATGA<br>CGG                                                                                                                                                                                                                                                                                                                                                                                                                                                                                                                                                                                                                                                                                                                                                                                                                                                                                                                                                                     |
| oligo1065             | CGATTAACAAGGATGACGATGACAAGATGAAAGAGAGAGAG<br>AGCTCC                                                                                                                                                                                                                                                                                                                                                                                                                                                                                                                                                                                                                                                                                                                                                                                                                                                                                                                                                              |
| oligo1066             | GTGACGGGCGGGATCCGATCTGAGAGAAAACGCTAAC<br>TCTTTATGAAAT                                                                                                                                                                                                                                                                                                                                                                                                                                                                                                                                                                                                                                                                                                                                                                                                                                                                                                                                                            |
| oligo1073             | TTGAGATTCAAGTGGAGGATGACAAAGTGGGA                                                                                                                                                                                                                                                                                                                                                                                                                                                                                                                                                                                                                                                                                                                                                                                                                                                                                                                                                                                 |
| oligo1074             | GACTCGAAATCTCCACATAATCTTTTGTGTTA                                                                                                                                                                                                                                                                                                                                                                                                                                                                                                                                                                                                                                                                                                                                                                                                                                                                                                                                                                                 |
| oligo1094             | CCAAAAGTCTCAAGTGGCGGCTCAGCAGTGAACAATGAC<br>AC                                                                                                                                                                                                                                                                                                                                                                                                                                                                                                                                                                                                                                                                                                                                                                                                                                                                                                                                                                    |
| oligo1096             | AAAAGTCTCAAGTGGCGGCTCAGCAGGAAACAATAAT<br>TC                                                                                                                                                                                                                                                                                                                                                                                                                                                                                                                                                                                                                                                                                                                                                                                                                                                                                                                                                                      |
| oligo1099             | TTGAGGATAGGATTAACACCGCTTATCATGAACTGGAAT<br>G                                                                                                                                                                                                                                                                                                                                                                                                                                                                                                                                                                                                                                                                                                                                                                                                                                                                                                                                                                     |
| oligo1100             | ATCTTATGACTGGAATAGTGGGATTTTCTTTCAAT                                                                                                                                                                                                                                                                                                                                                                                                                                                                                                                                                                                                                                                                                                                                                                                                                                                                                                                                                                              |
| oligo1101             | AAGCTCAGATAGGATAACCGGCTTATCATGAACTGGAAAT<br>G                                                                                                                                                                                                                                                                                                                                                                                                                                                                                                                                                                                                                                                                                                                                                                                                                                                                                                                                                                    |
| oligo1102             | ATCTTATGAGCTTTAGTGGGATTTTCTTTCAAT                                                                                                                                                                                                                                                                                                                                                                                                                                                                                                                                                                                                                                                                                                                                                                                                                                                                                                                                                                                |
| oligo1104             | AAGCTCAGATAGGATAGCGCGCTTATCATGAACTGGAAAT<br>G                                                                                                                                                                                                                                                                                                                                                                                                                                                                                                                                                                                                                                                                                                                                                                                                                                                                                                                                                                    |
| oligo1106             | AATCCCTGAGCTTTAGTGGGATTTTCTTTCAAT                                                                                                                                                                                                                                                                                                                                                                                                                                                                                                                                                                                                                                                                                                                                                                                                                                                                                                                                                                                |
| oligo1107             | AAGCTCAGGAGGATAGCGCGCTTATCATGAACTGGAAAT<br>G                                                                                                                                                                                                                                                                                                                                                                                                                                                                                                                                                                                                                                                                                                                                                                                                                                                                                                                                                                     |
| oligo1118             | TATAGGGAGACCCAAAGTGGCGGCTCAGGATGATGATCC<br>ATACGATGTTCCAGATACGCTTACCAATACGATGTTCCAGAT<br>ACGCTTACCAATACGATGTTCCAGATACGCTATGGGAGAAA<br>GAGAAGAACCG                                                                                                                                                                                                                                                                                                                                                                                                                                                                                                                                                                                                                                                                                                                                                                                                                                                                |
| oligo1119             | TATAGGGAGACCCAAAGTGGCGGCTCAGGATGATGATCC<br>ATACGATGTTCCAGATACGCTTACCAATACGATGTTCCAGAT<br>ACGCTTACCAATACGATGTTCCAGATACGCTATGGGAGAGG<br>TTGGTTATCG                                                                                                                                                                                                                                                                                                                                                                                                                                                                                                                                                                                                                                                                                                                                                                                                                                                                 |
| oligo1159             | ACACCCAAAGTCTCAAGTGGCGGCTCAGCAGTAAACA<br>TGAAT                                                                                                                                                                                                                                                                                                                                                                                                                                                                                                                                                                                                                                                                                                                                                                                                                                                                                                                                                                   |
| oligo1160             | GGCTACCGGAAACAGATTGGAGGATGGAAGAAAACCTCA<br>TCACTATC                                                                                                                                                                                                                                                                                                                                                                                                                                                                                                                                                                                                                                                                                                                                                                                                                                                                                                                                                              |
| oligo1161             | TTCAATGATAAATTAAGCGGTTATCTTACTGTA                                                                                                                                                                                                                                                                                                                                                                                                                                                                                                                                                                                                                                                                                                                                                                                                                                                                                                                                                                                |
| oligo1162             | TAATTTATGATAAGTGAATGCTGGAAGAAAAC                                                                                                                                                                                                                                                                                                                                                                                                                                                                                                                                                                                                                                                                                                                                                                                                                                                                                                                                                                                 |
| oligo1163             | TTCAATGATAAAGTAAAGCGGTTATCTTACTGTA                                                                                                                                                                                                                                                                                                                                                                                                                                                                                                                                                                                                                                                                                                                                                                                                                                                                                                                                                                               |
| oligo1164             | TAACCTATCATGAACTGGAATGCGGAGAAA                                                                                                                                                                                                                                                                                                                                                                                                                                                                                                                                                                                                                                                                                                                                                                                                                                                                                                                                                                                   |
| oligo1165             | TCAATGATAAAGTAAAGCGGTTATCTTACTGTA                                                                                                                                                                                                                                                                                                                                                                                                                                                                                                                                                                                                                                                                                                                                                                                                                                                                                                                                                                                |
| oligo1166             | TAACCTTATCATGAACTGGAATGCGGAGAAA                                                                                                                                                                                                                                                                                                                                                                                                                                                                                                                                                                                                                                                                                                                                                                                                                                                                                                                                                                                  |
| oligo1167             | CAATGATAAAGTAAAGCGGTTATCTTACTGTA                                                                                                                                                                                                                                                                                                                                                                                                                                                                                                                                                                                                                                                                                                                                                                                                                                                                                                                                                                                 |
| oligo1168             | TAACTGTTATCATGAACTGGAATGCGGAGAAA                                                                                                                                                                                                                                                                                                                                                                                                                                                                                                                                                                                                                                                                                                                                                                                                                                                                                                                                                                                 |
| oligo1180             | AGTTCAATGATAAAGCGGTTATCTTACTGTA                                                                                                                                                                                                                                                                                                                                                                                                                                                                                                                                                                                                                                                                                                                                                                                                                                                                                                                                                                                  |
| oligo1181             | TTTATCATGAACTGGAATGCGGAGAAAACCTC                                                                                                                                                                                                                                                                                                                                                                                                                                                                                                                                                                                                                                                                                                                                                                                                                                                                                                                                                                                 |
| oligo1182             | GTTTCAATGATAAAGCGGTTATCTTACTGTA                                                                                                                                                                                                                                                                                                                                                                                                                                                                                                                                                                                                                                                                                                                                                                                                                                                                                                                                                                                  |
| oligo1183             | TATTTATCATGAACTGGAATGCGGAGAAAACCTC                                                                                                                                                                                                                                                                                                                                                                                                                                                                                                                                                                                                                                                                                                                                                                                                                                                                                                                                                                               |
| oligo1197             | TCTCTCTCTCAATAAAGAGAGAGAGAGGCTCC                                                                                                                                                                                                                                                                                                                                                                                                                                                                                                                                                                                                                                                                                                                                                                                                                                                                                                                                                                                 |
| oligo1198             | TTGAGAGAGAGAAATGGAACAGC                                                                                                                                                                                                                                                                                                                                                                                                                                                                                                                                                                                                                                                                                                                                                                                                                                                                                                                                                                                          |
| oligo1201             | GACTTAGAGGATCCCGGCTACCTGAGGTCGACATCCAC<br>C                                                                                                                                                                                                                                                                                                                                                                                                                                                                                                                                                                                                                                                                                                                                                                                                                                                                                                                                                                      |
| oligo1202             | GAGAAATGAAATGATCATCTAG                                                                                                                                                                                                                                                                                                                                                                                                                                                                                                                                                                                                                                                                                                                                                                                                                                                                                                                                                                                           |
| oligo1203             | CTAGATGATGATTTTACTTCT                                                                                                                                                                                                                                                                                                                                                                                                                                                                                                                                                                                                                                                                                                                                                                                                                                                                                                                                                                                            |
| oligo1204             | GCTGGGCGGCTCAGGAACTGTTAATTAAGAAATTCGAA<br>CCACTT                                                                                                                                                                                                                                                                                                                                                                                                                                                                                                                                                                                                                                                                                                                                                                                                                                                                                                                                                                 |
| oligo1205             | GATAGGATAACACCGCTTAACTGTTATCATGAACTGGAAT<br>GCC                                                                                                                                                                                                                                                                                                                                                                                                                                                                                                                                                                                                                                                                                                                                                                                                                                                                                                                                                                  |
| oligo1206             | AACAGTTAAGCGGTTATCTTACTG                                                                                                                                                                                                                                                                                                                                                                                                                                                                                                                                                                                                                                                                                                                                                                                                                                                                                                                                                                                         |
| oligo1207             | CAGATAGGATAACACCGCTTAACTGTTAATTAAGAAATTCGAA<br>CCACTT                                                                                                                                                                                                                                                                                                                                                                                                                                                                                                                                                                                                                                                                                                                                                                                                                                                                                                                                                            |
| oligo1208             | TAATTAAGCGGTTATCTTACTG                                                                                                                                                                                                                                                                                                                                                                                                                                                                                                                                                                                                                                                                                                                                                                                                                                                                                                                                                                                           |
| oligo1209             | TTGAGGATAGGATAACACCGCTTATCATGAACTGGAAT<br>GCGGTTTATCTTACTGCTGAAATGAGTGGATTTTCTTTCTCA                                                                                                                                                                                                                                                                                                                                                                                                                                                                                                                                                                                                                                                                                                                                                                                                                                                                                                                             |
| oligo1210             | TTTATCACTGAACTGGAATGCGGAGAAAACCTC                                                                                                                                                                                                                                                                                                                                                                                                                                                                                                                                                                                                                                                                                                                                                                                                                                                                                                                                                                                |
| oligo1211             | TTTATCACTGAACTGGAATGCGGAGAAAACCTC                                                                                                                                                                                                                                                                                                                                                                                                                                                                                                                                                                                                                                                                                                                                                                                                                                                                                                                                                                                |
| oligo1212             | AGAAGAGCTCCATGATGATAATGAGGAGACCGAAGTTCT                                                                                                                                                                                                                                                                                                                                                                                                                                                                                                                                                                                                                                                                                                                                                                                                                                                                                                                                                                          |
| oligo1220             | GCTTATCATGAACTGGAATG                                                                                                                                                                                                                                                                                                                                                                                                                                                                                                                                                                                                                                                                                                                                                                                                                                                                                                                                                                                             |
| oligo1221             | TTTCAATGATAAAGCGGTTATCTTACTGAGCT                                                                                                                                                                                                                                                                                                                                                                                                                                                                                                                                                                                                                                                                                                                                                                                                                                                                                                                                                                                 |
| oligoA1               | AAACCTAAACCCTAACGGC                                                                                                                                                                                                                                                                                                                                                                                                                                                                                                                                                                                                                                                                                                                                                                                                                                                                                                                                                                                              |
| oligoA2               | TTACAATTTCAATAAATGATATAATTTTACA                                                                                                                                                                                                                                                                                                                                                                                                                                                                                                                                                                                                                                                                                                                                                                                                                                                                                                                                                                                  |
| oligoA3               | AATTTGGGCTCTAGATGA                                                                                                                                                                                                                                                                                                                                                                                                                                                                                                                                                                                                                                                                                                                                                                                                                                                                                                                                                                                               |
| oligoA4               | CACCTCAATGCTTTTGTGCTCACTCAAACTCGATCTCAA<br>TCTAGC                                                                                                                                                                                                                                                                                                                                                                                                                                                                                                                                                                                                                                                                                                                                                                                                                                                                                                                                                                |
| oligoA5               | ATGGACTCAAGACCATGAC                                                                                                                                                                                                                                                                                                                                                                                                                                                                                                                                                                                                                                                                                                                                                                                                                                                                                                                                                                                              |
| oligoA6               | TAGACAGGGATATCGAACCTAACATCTGTCTGCTATCTTG<br>T                                                                                                                                                                                                                                                                                                                                                                                                                                                                                                                                                                                                                                                                                                                                                                                                                                                                                                                                                                    |
| oligoA7               | AATTTAGGTTGATATKCCCTGCTATTGTC                                                                                                                                                                                                                                                                                                                                                                                                                                                                                                                                                                                                                                                                                                                                                                                                                                                                                                                                                                                    |
| oligoA8               | GCTTGGTACCGACTGGAT                                                                                                                                                                                                                                                                                                                                                                                                                                                                                                                                                                                                                                                                                                                                                                                                                                                                                                                                                                                               |
| oligoA9               | TAATACGACTCAATAGGGAACCTAAACCCCTAACGGCTAA<br>GC                                                                                                                                                                                                                                                                                                                                                                                                                                                                                                                                                                                                                                                                                                                                                                                                                                                                                                                                                                   |
| oligoA10              | TTTTTTTTTTTTTTTTTTTTTTTTTTTTTTTTTTTTTTTTTT<br>TTTTTTTTTTTAAATAATATCATTTAATGAAATTTGAA<br>TCAATGAACTGGATGCGGAGAAAACCTCAATGCTCA                                                                                                                                                                                                                                                                                                                                                                                                                                                                                                                                                                                                                                                                                                                                                                                                                                                                                     |
| oligo1231             | AAGAAAACCTCAATGCTCAGCACGGGATCCCAATAATC                                                                                                                                                                                                                                                                                                                                                                                                                                                                                                                                                                                                                                                                                                                                                                                                                                                                                                                                                                           |
| oligo1232             | GCACAGGGATCCAAATCTATGCTACCGAGGTTA                                                                                                                                                                                                                                                                                                                                                                                                                                                                                                                                                                                                                                                                                                                                                                                                                                                                                                                                                                                |
| oligo1233             | TCTATGCTACCGAGGTTATGTTTCTTAAATGCTTTG                                                                                                                                                                                                                                                                                                                                                                                                                                                                                                                                                                                                                                                                                                                                                                                                                                                                                                                                                                             |
| oligo1234             | TGTTTCTTAAATGCTTGGGAAAACCTCGGCTCGCTAA                                                                                                                                                                                                                                                                                                                                                                                                                                                                                                                                                                                                                                                                                                                                                                                                                                                                                                                                                                            |
| D7(+)-detection_probe | GGGGTCTACAAGTCAAGAA                                                                                                                                                                                                                                                                                                                                                                                                                                                                                                                                                                                                                                                                                                                                                                                                                                                                                                                                                                                              |
